# Supplementary material for: Structures of NF-κB p52 homodimer-DNA complexes rationalize binding mechanisms and transcription activation
Source: eLife journal article supplement (doi:10.7554/elife.86258), 2023-02-13

**His-Bcl3  
(1-446)**

**p52(1-327)**

**His-Bcl3  
(1-446)  
+  
p52(1-327)**

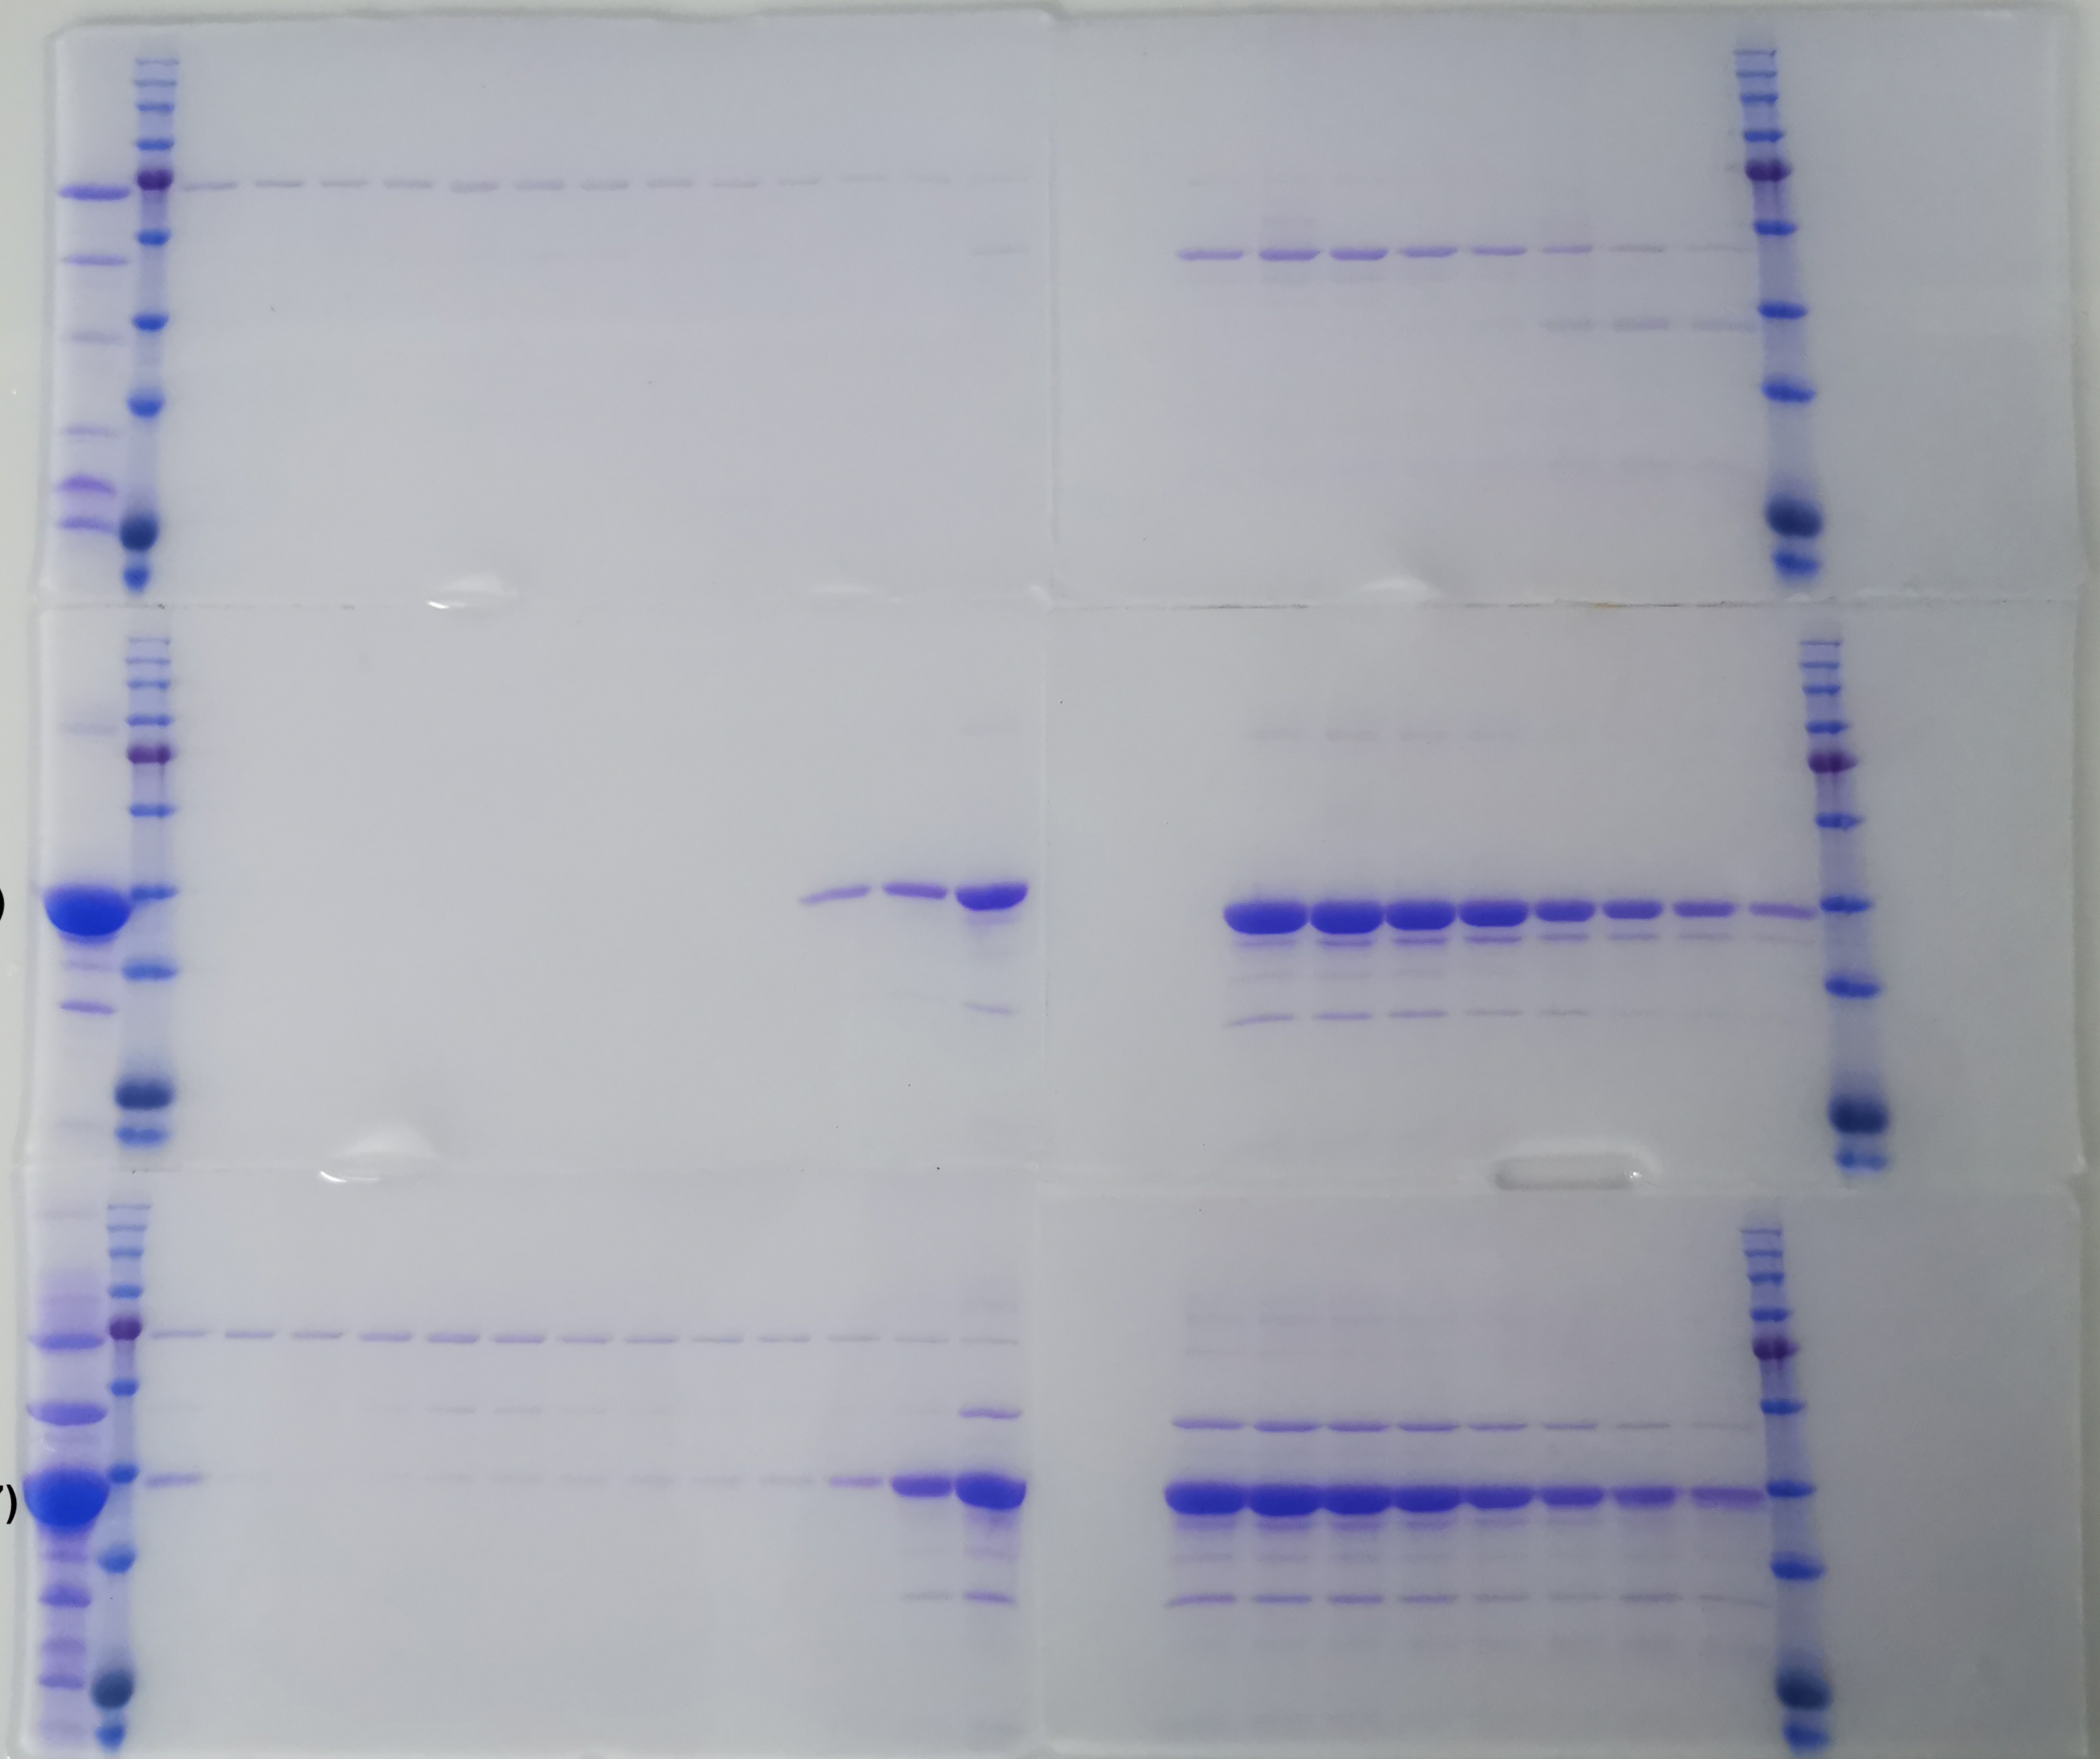

Supplement: fig1-figsupp1-data1 [file elife-86258-fig1-figsupp1-data1-v2.pdf]
