# Supplementary material for: Structures of NF-κB p52 homodimer-DNA complexes rationalize binding mechanisms and transcription activation
Source: eLife journal article supplement (doi:10.7554/elife.86258), 2023-02-13

**Bcl3  
(1-446)**

**p52  
(1-398)**

**Bcl3  
(1-446)  
+  
p52  
(1-398)**

**p52:p52:Bcl3 Complex  
(1-398)**

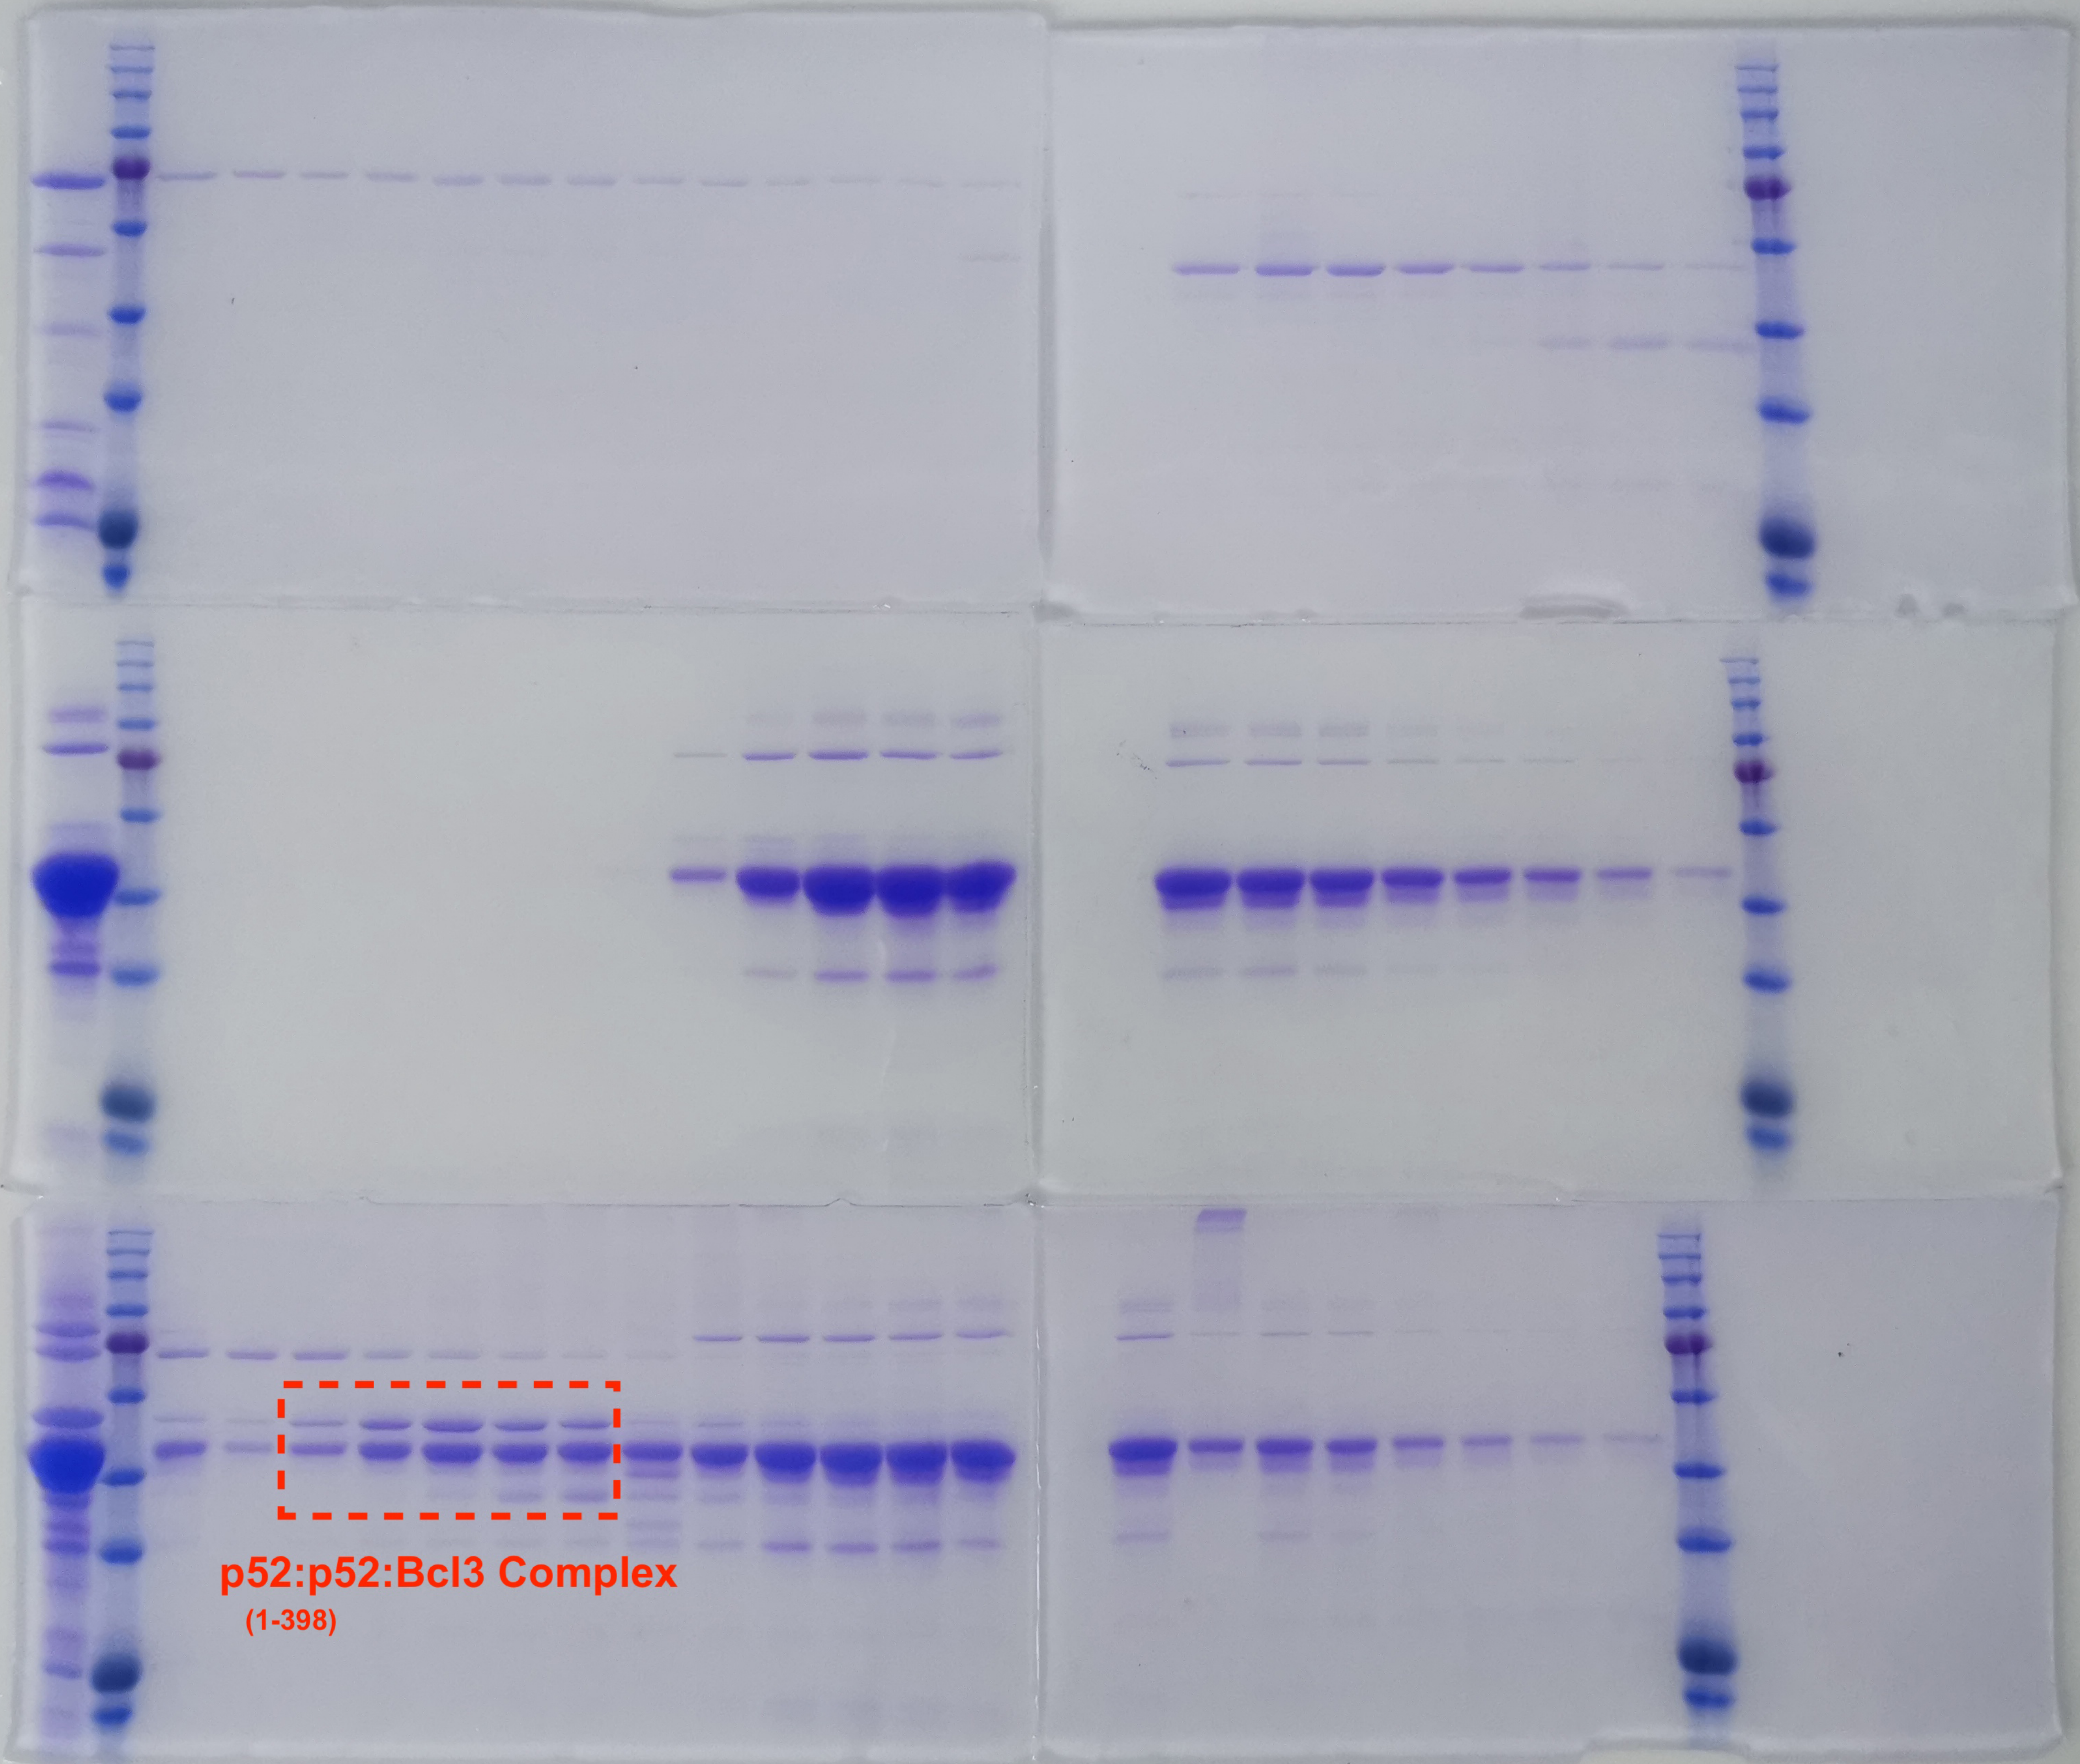

Supplement: fig1-figsupp1-data3 [file elife-86258-fig1-figsupp1-data3-v2.pdf]
