# Supplementary material for: Structures of NF-κB p52 homodimer-DNA complexes rationalize binding mechanisms and transcription activation
Source: eLife journal article supplement (doi:10.7554/elife.86258), 2023-02-13

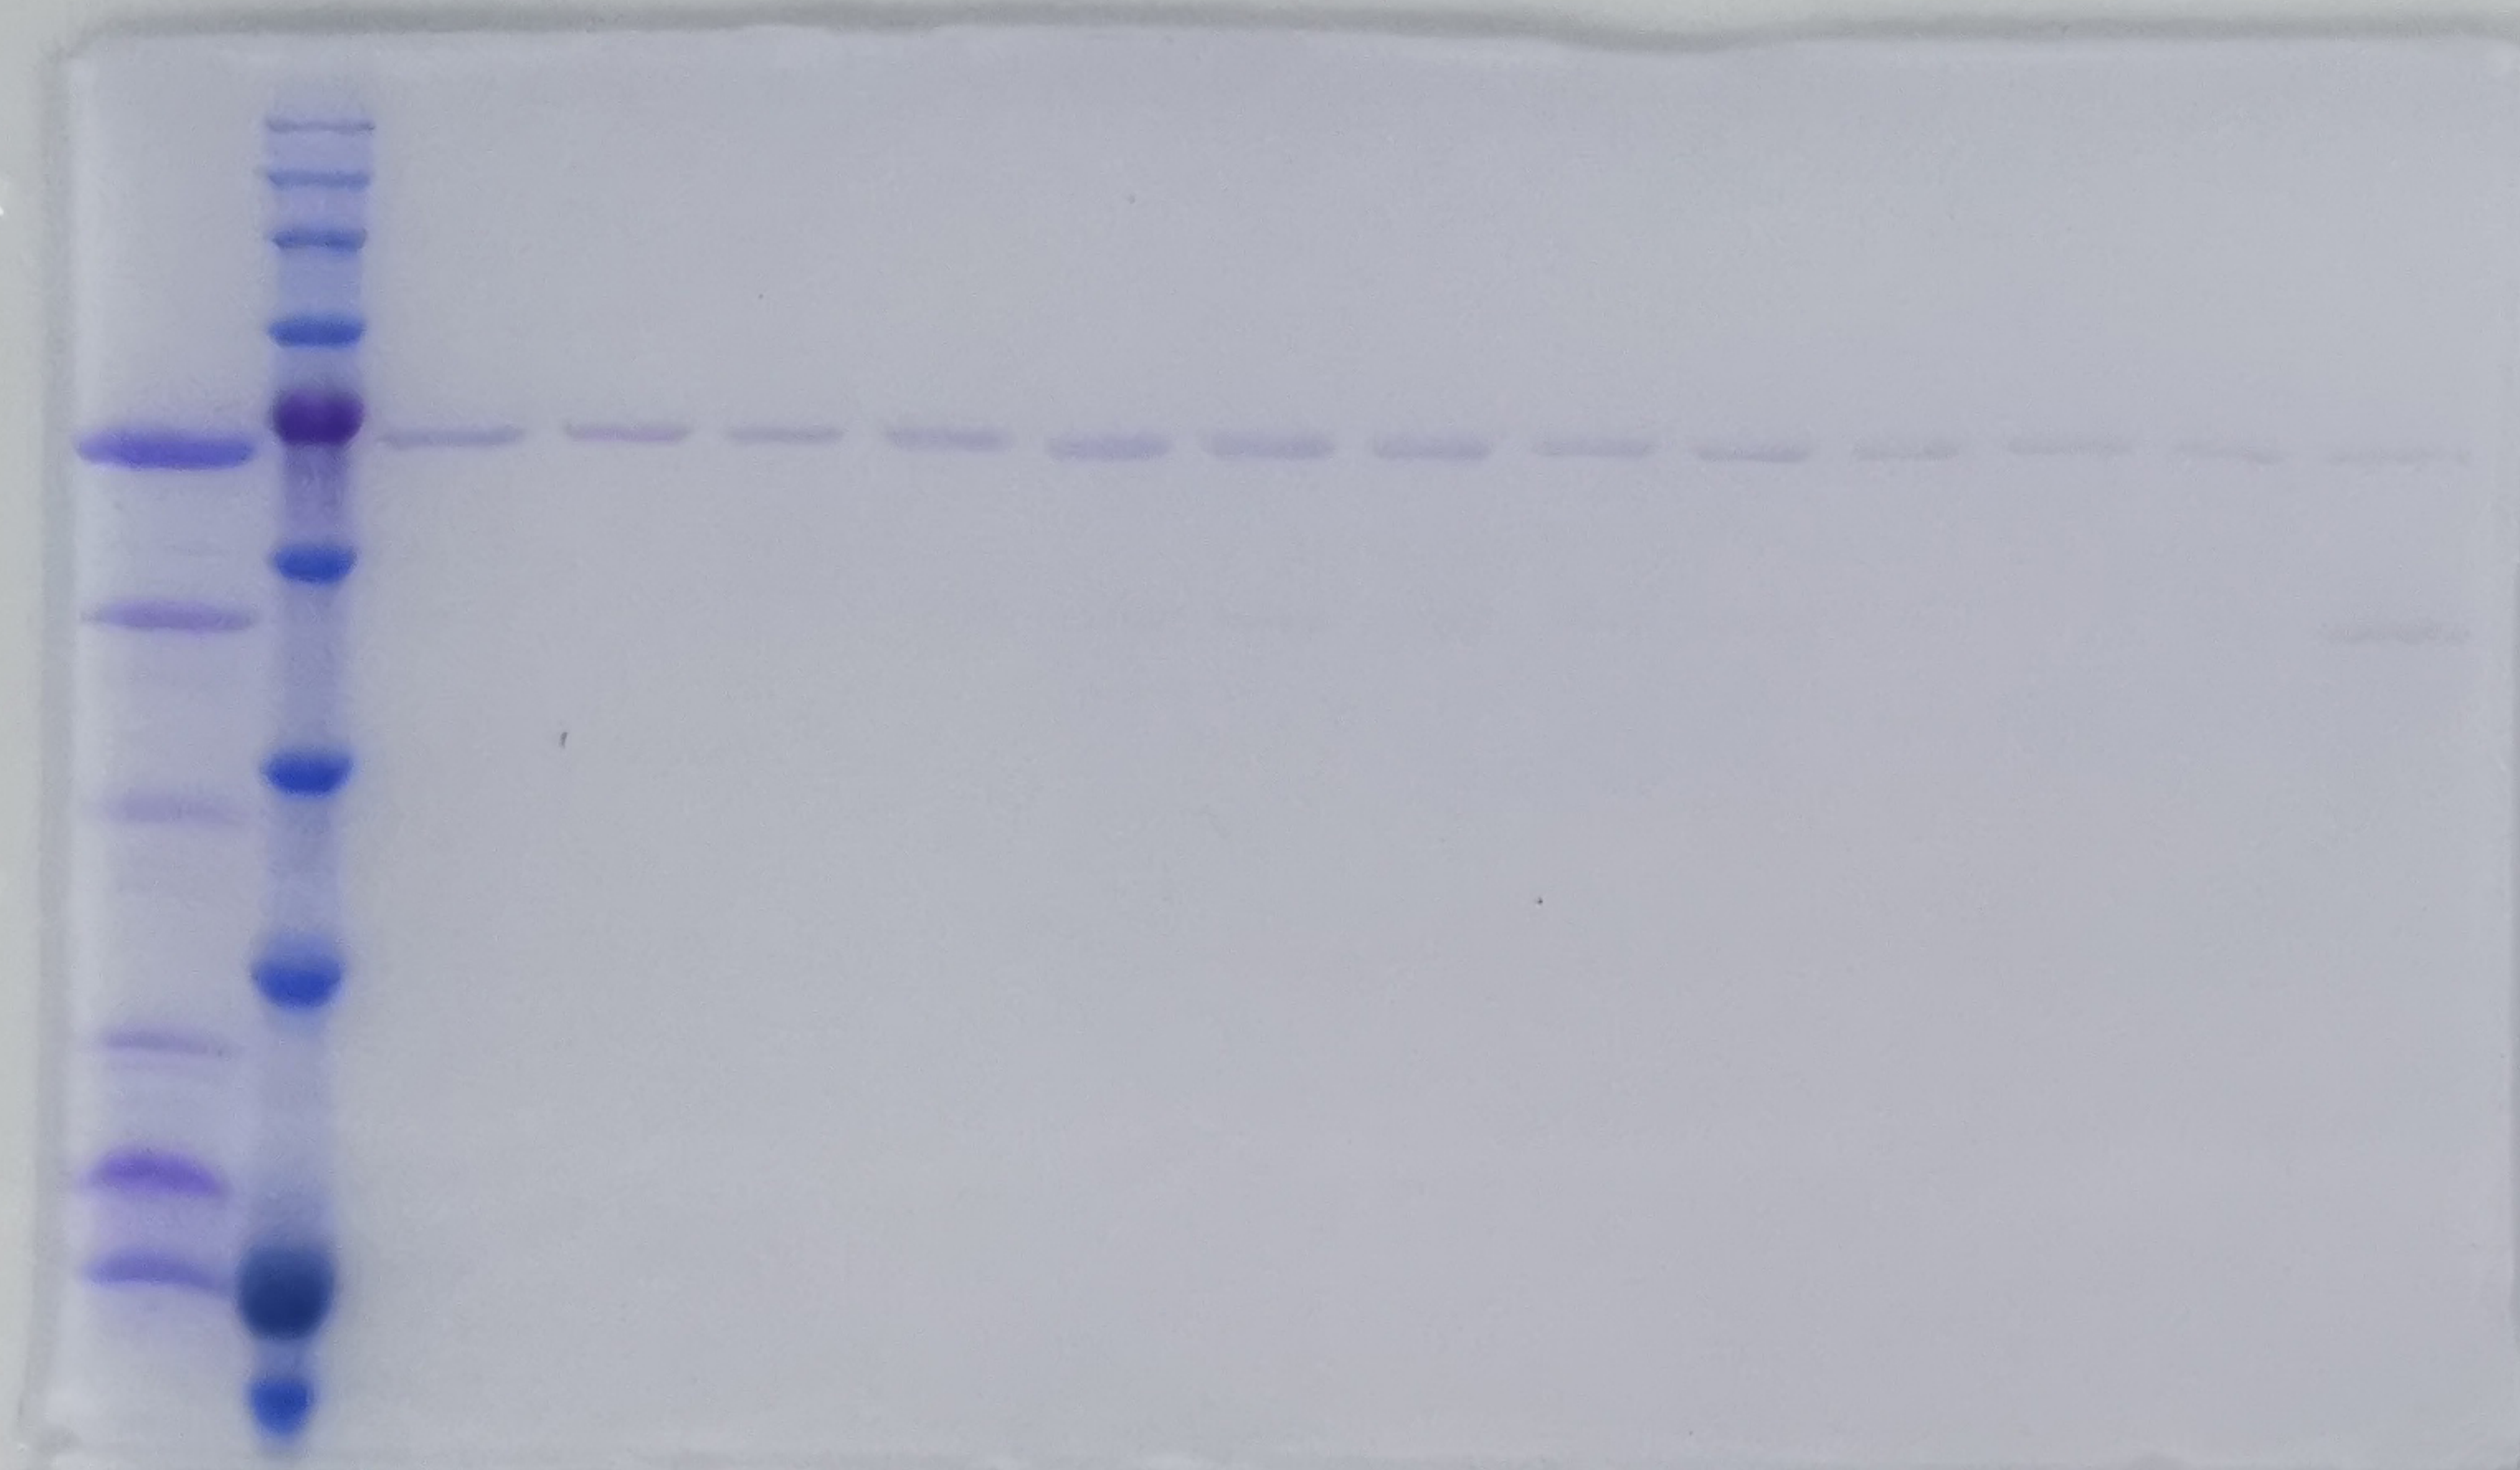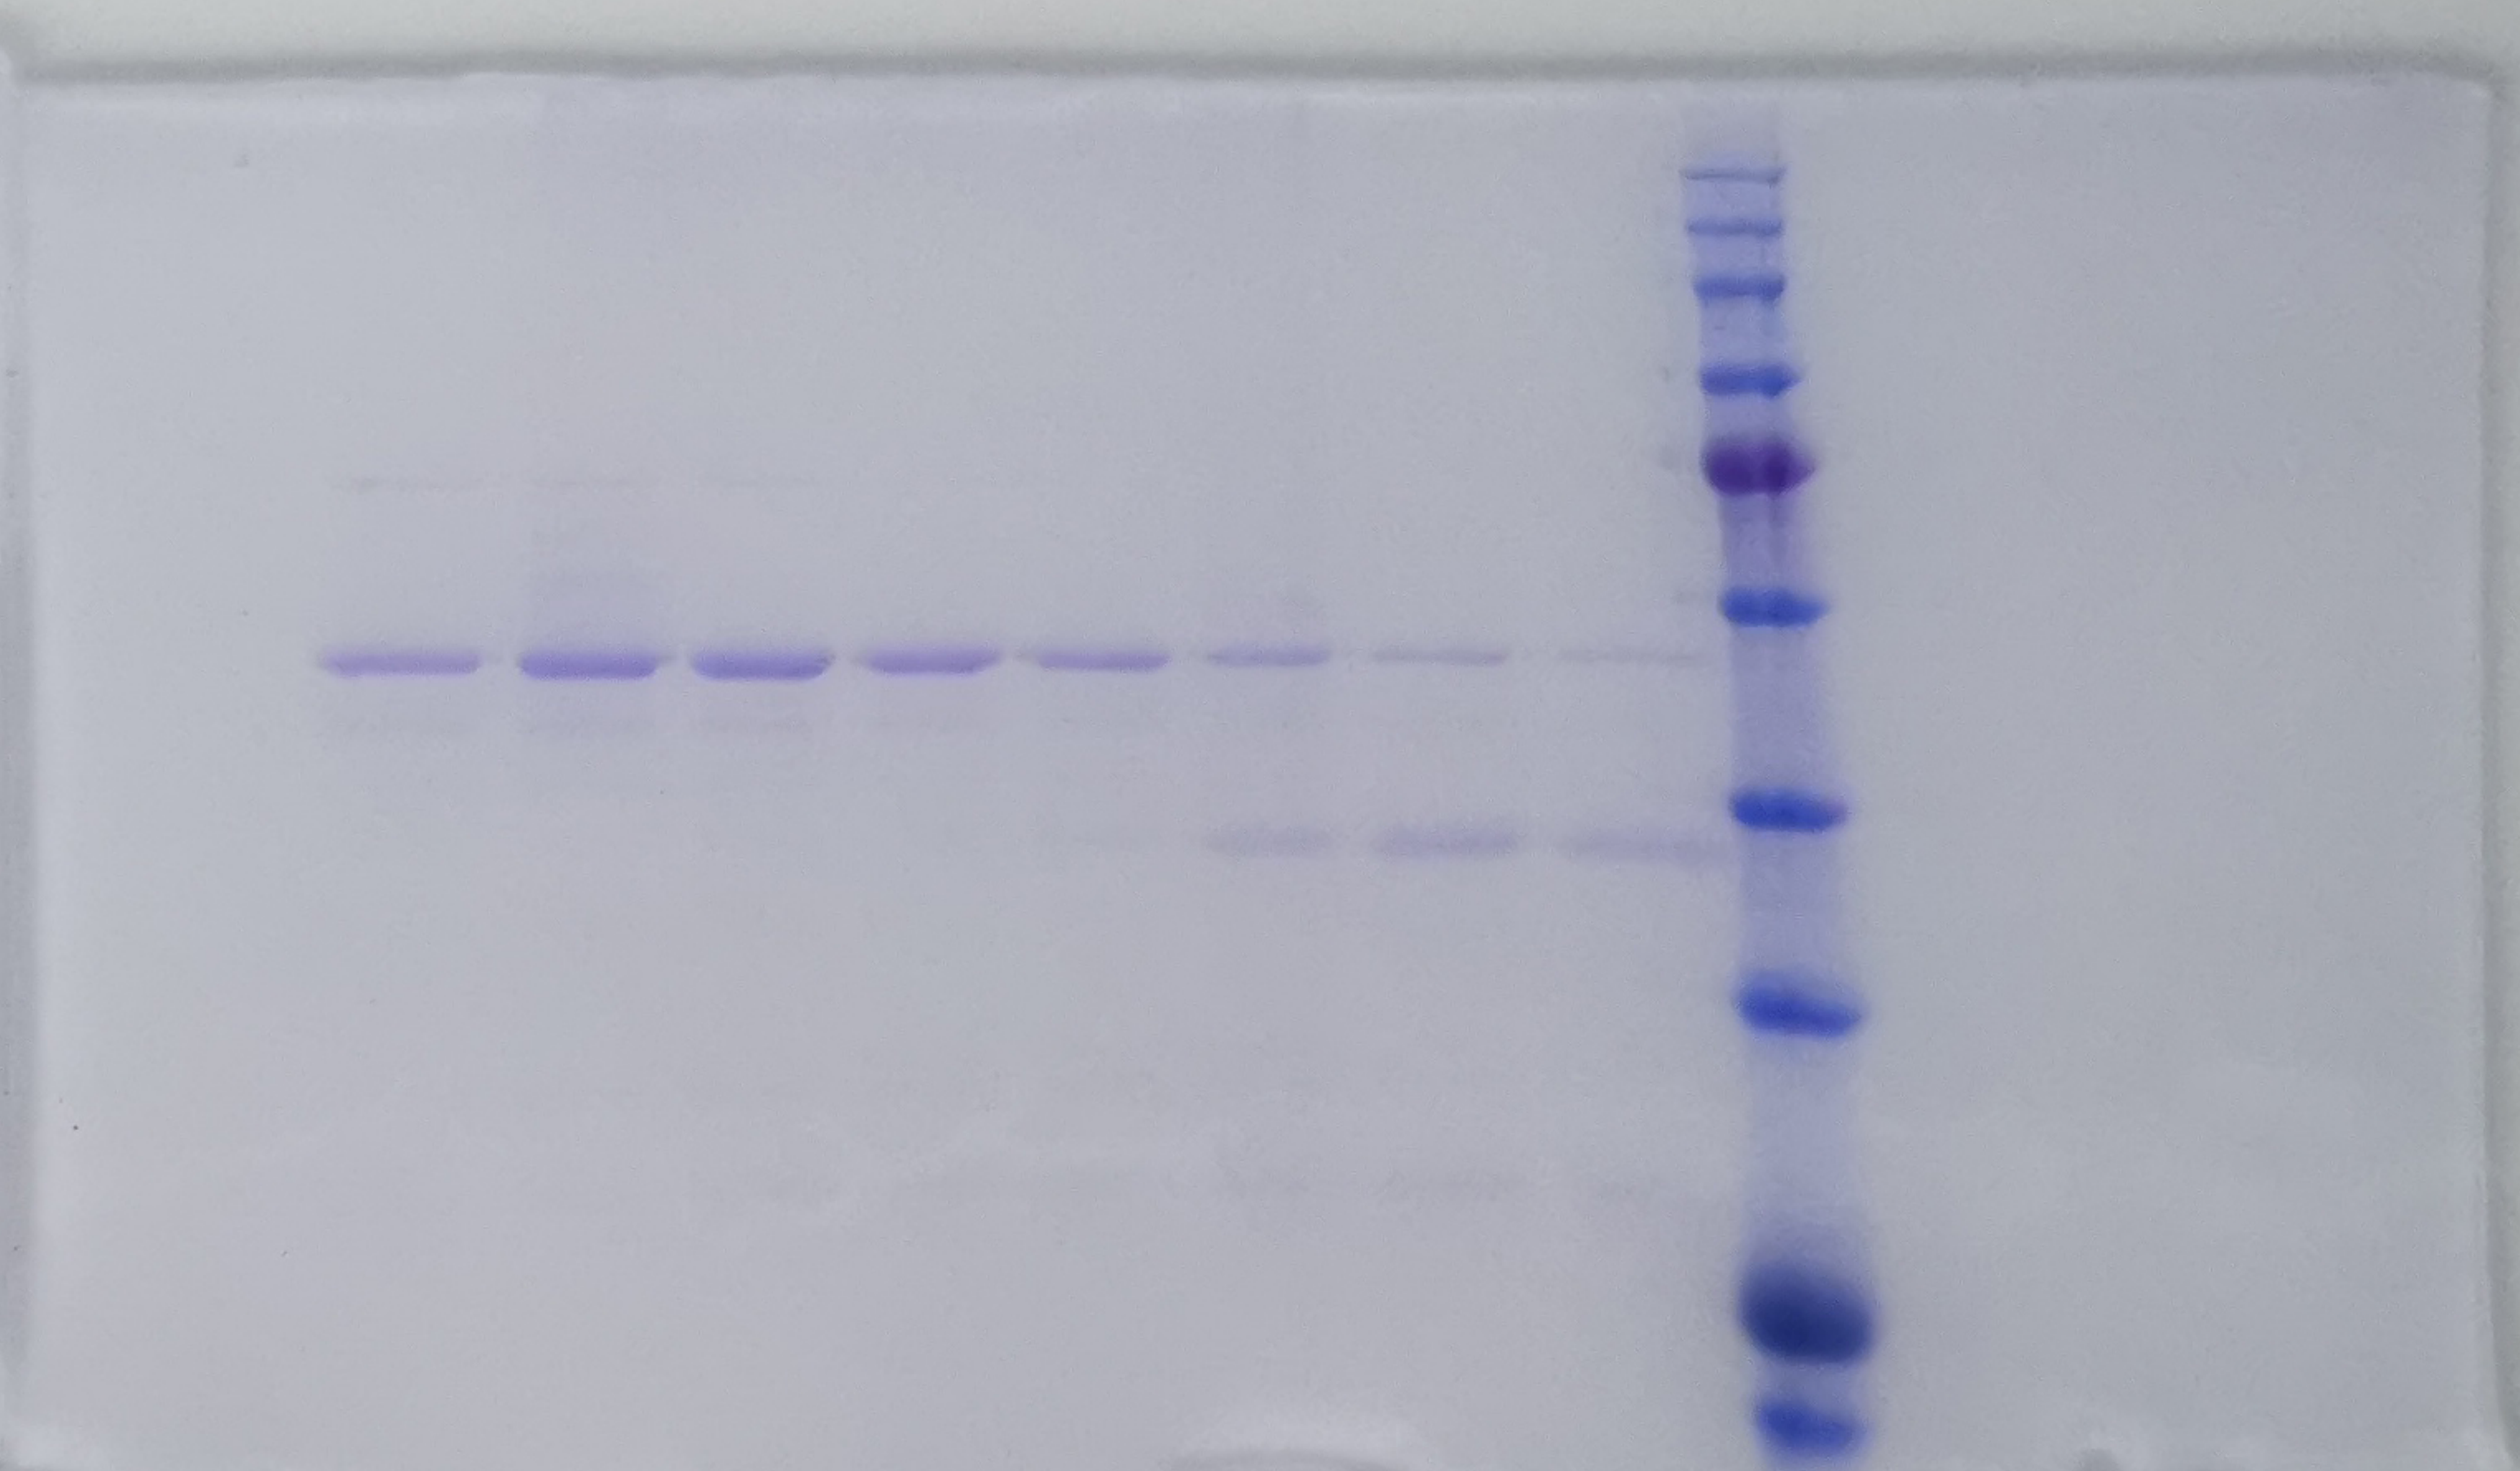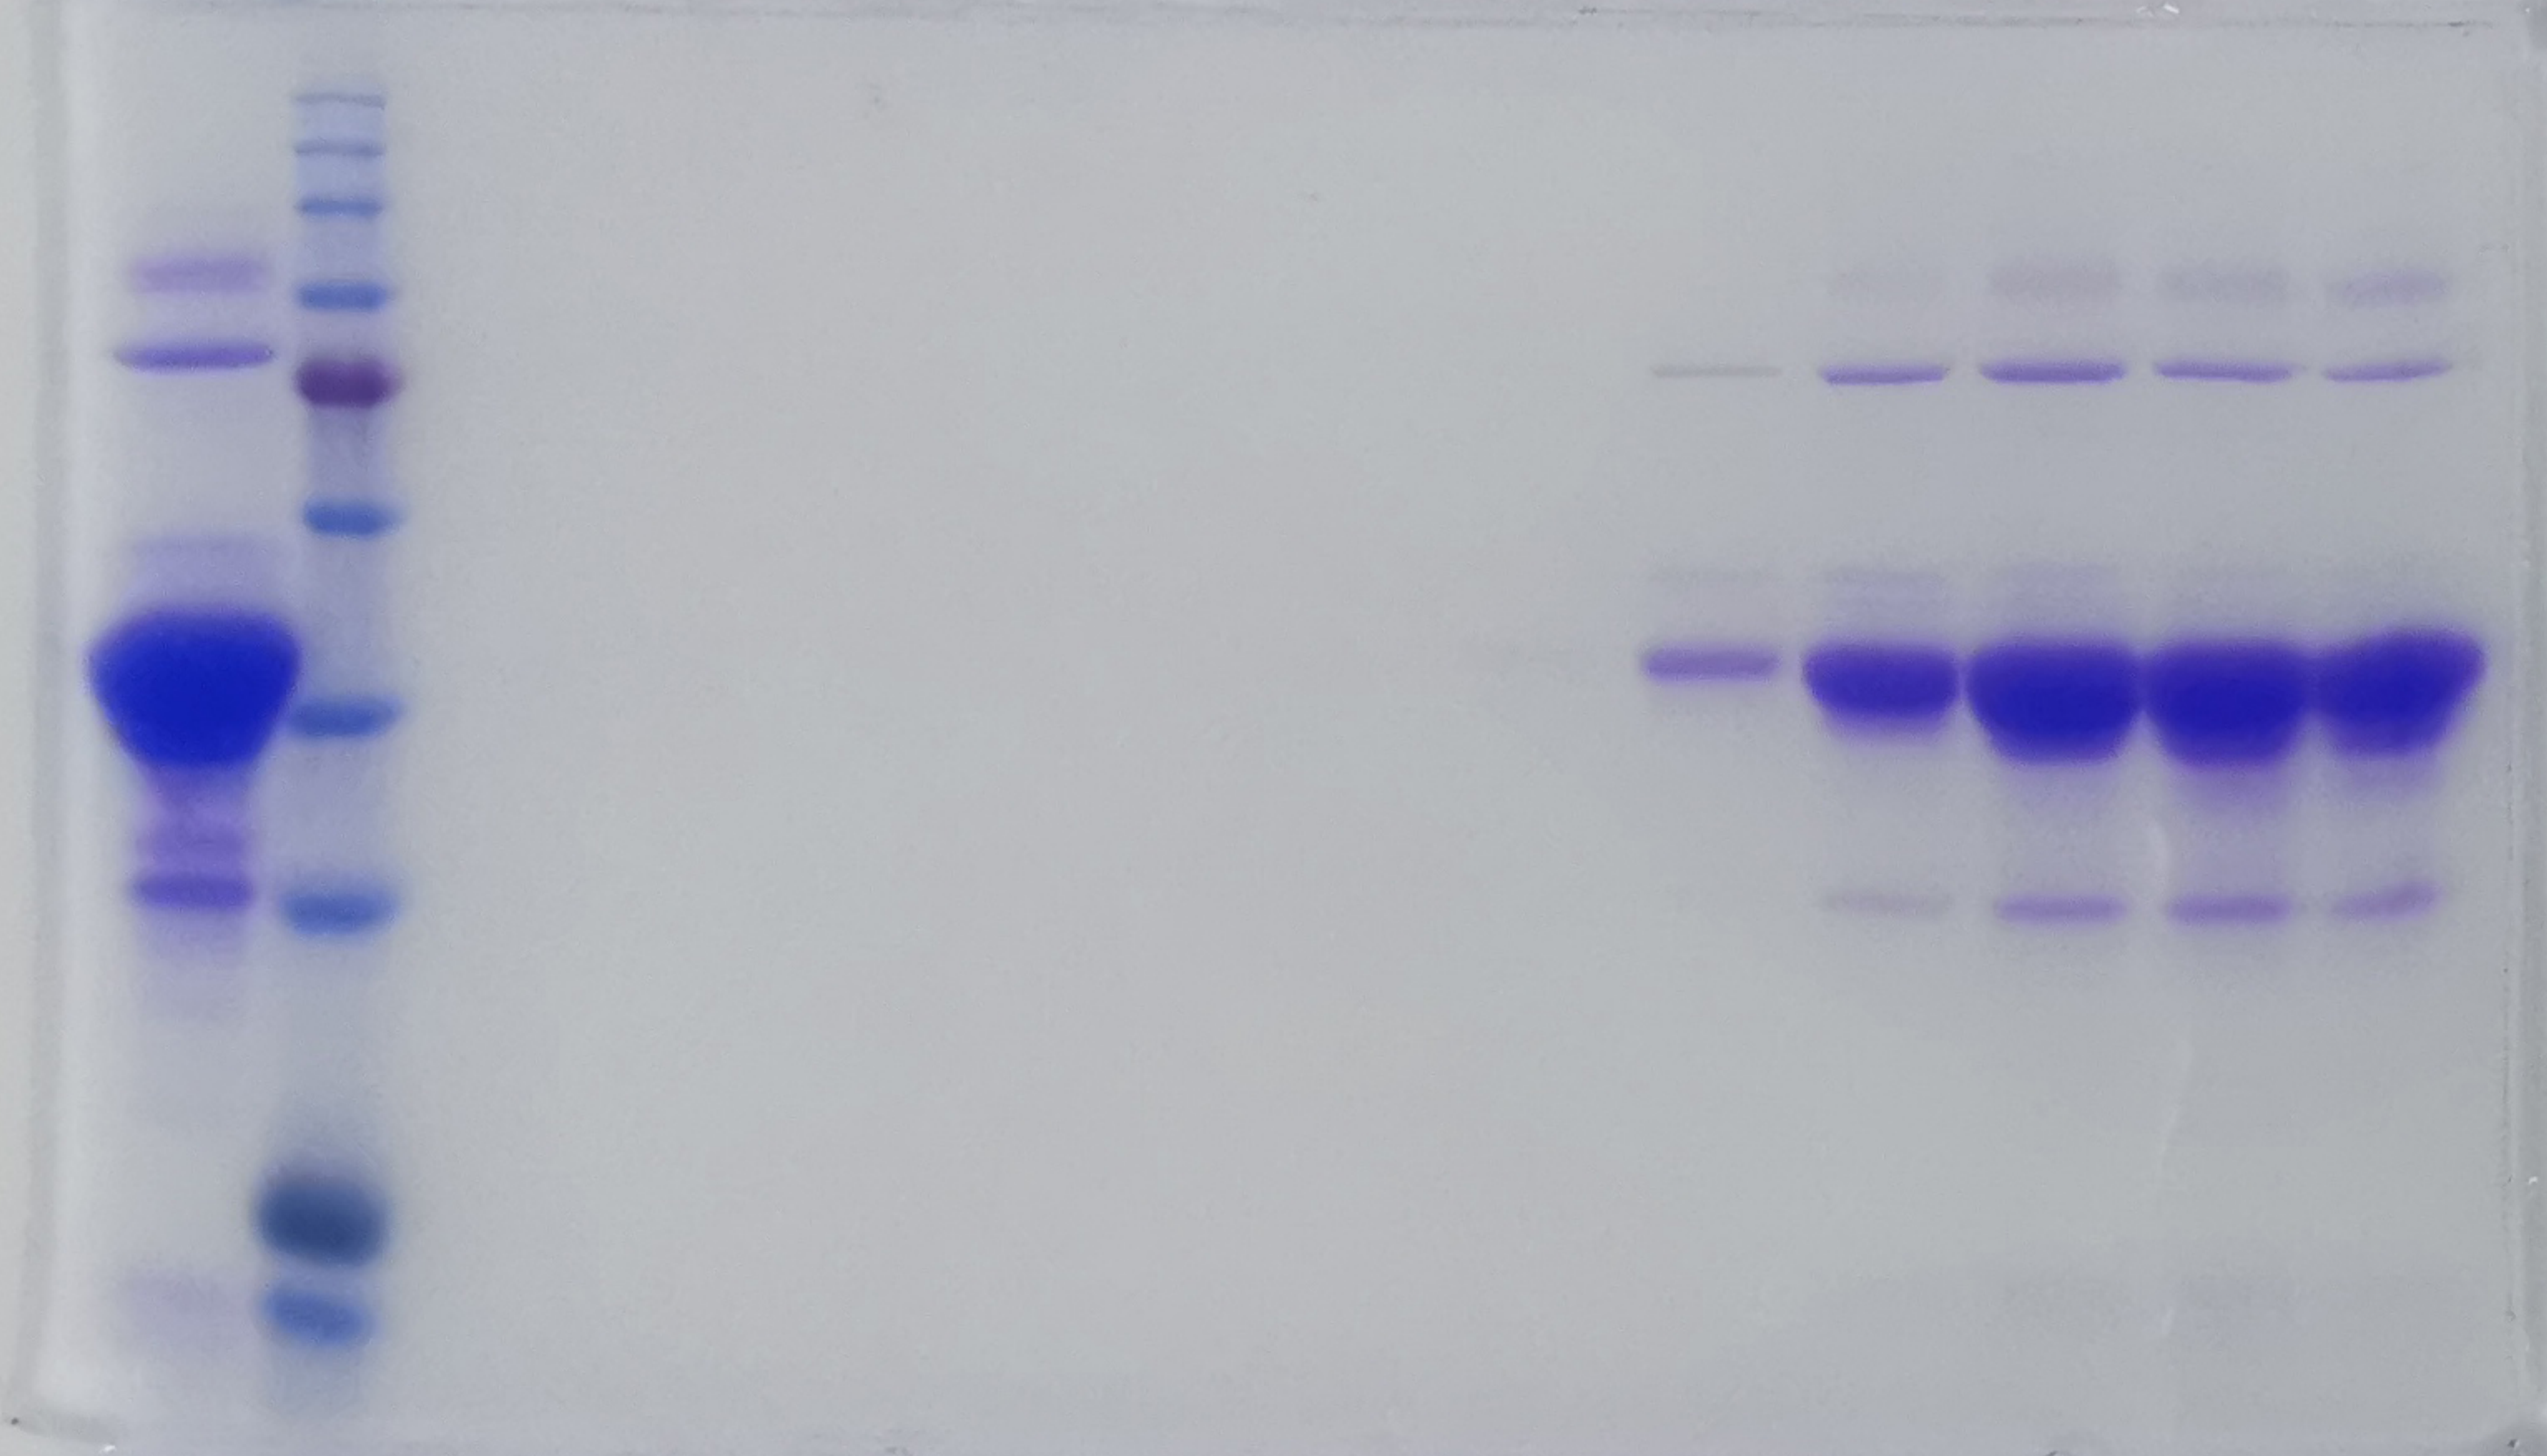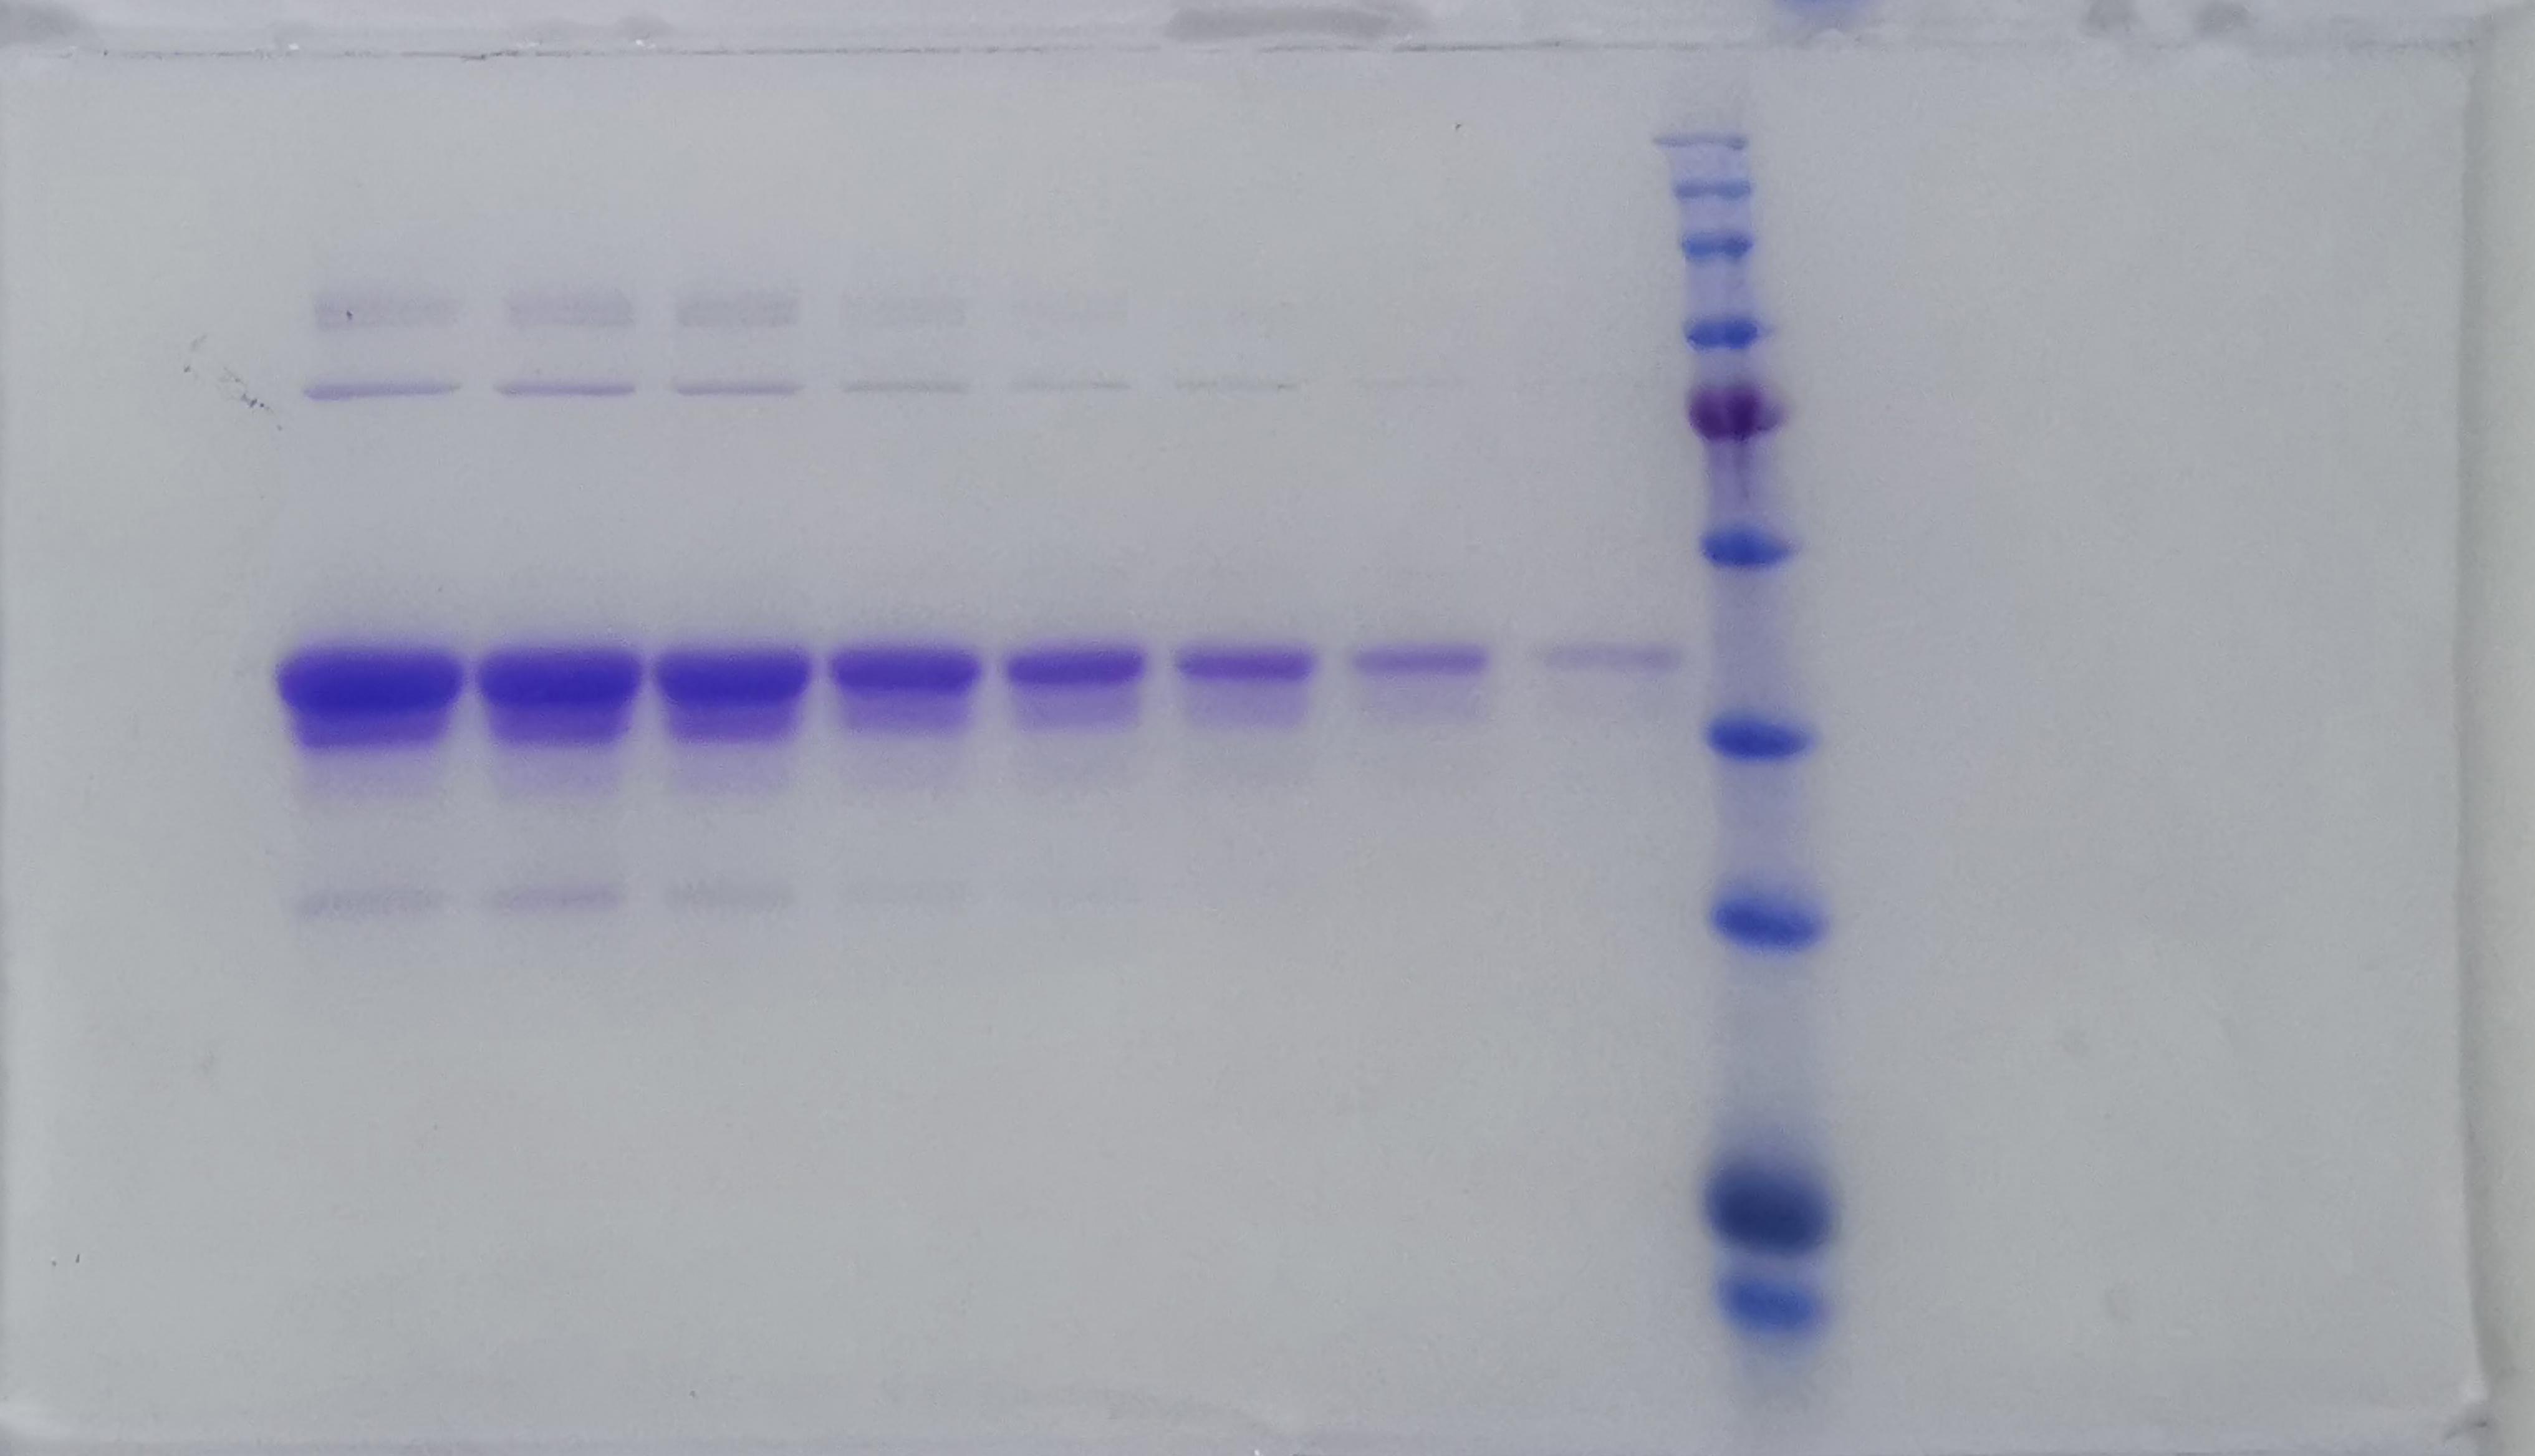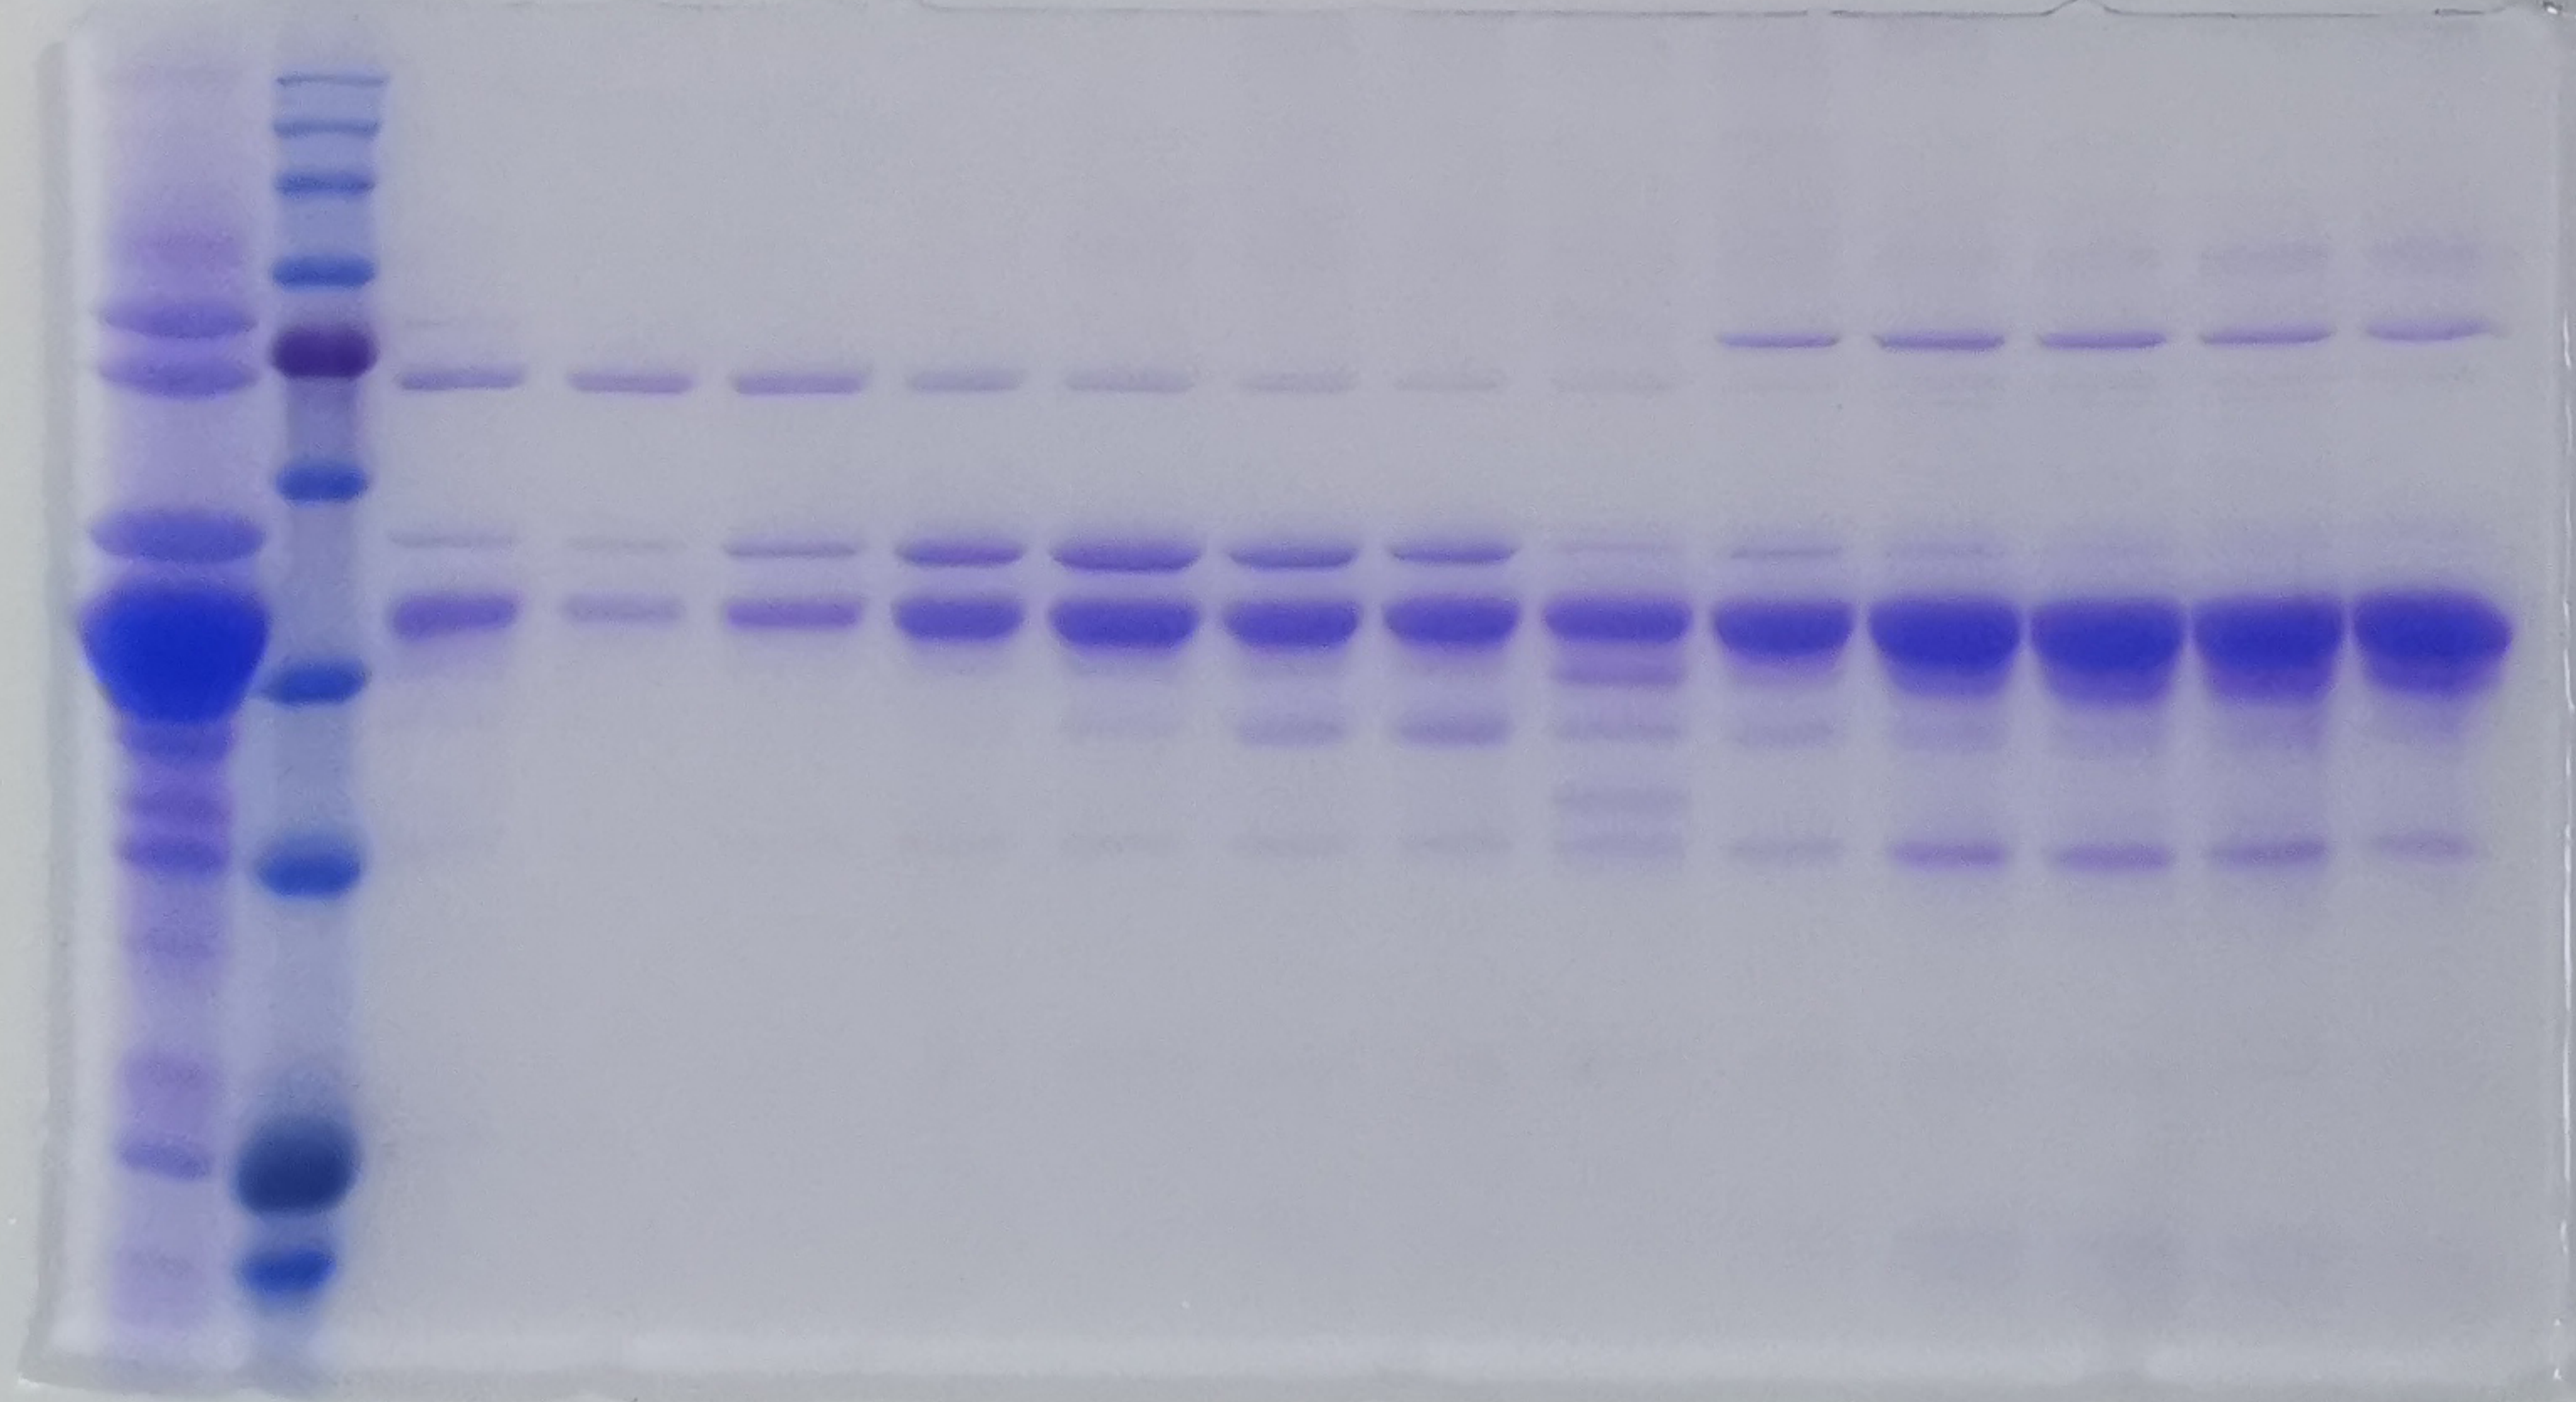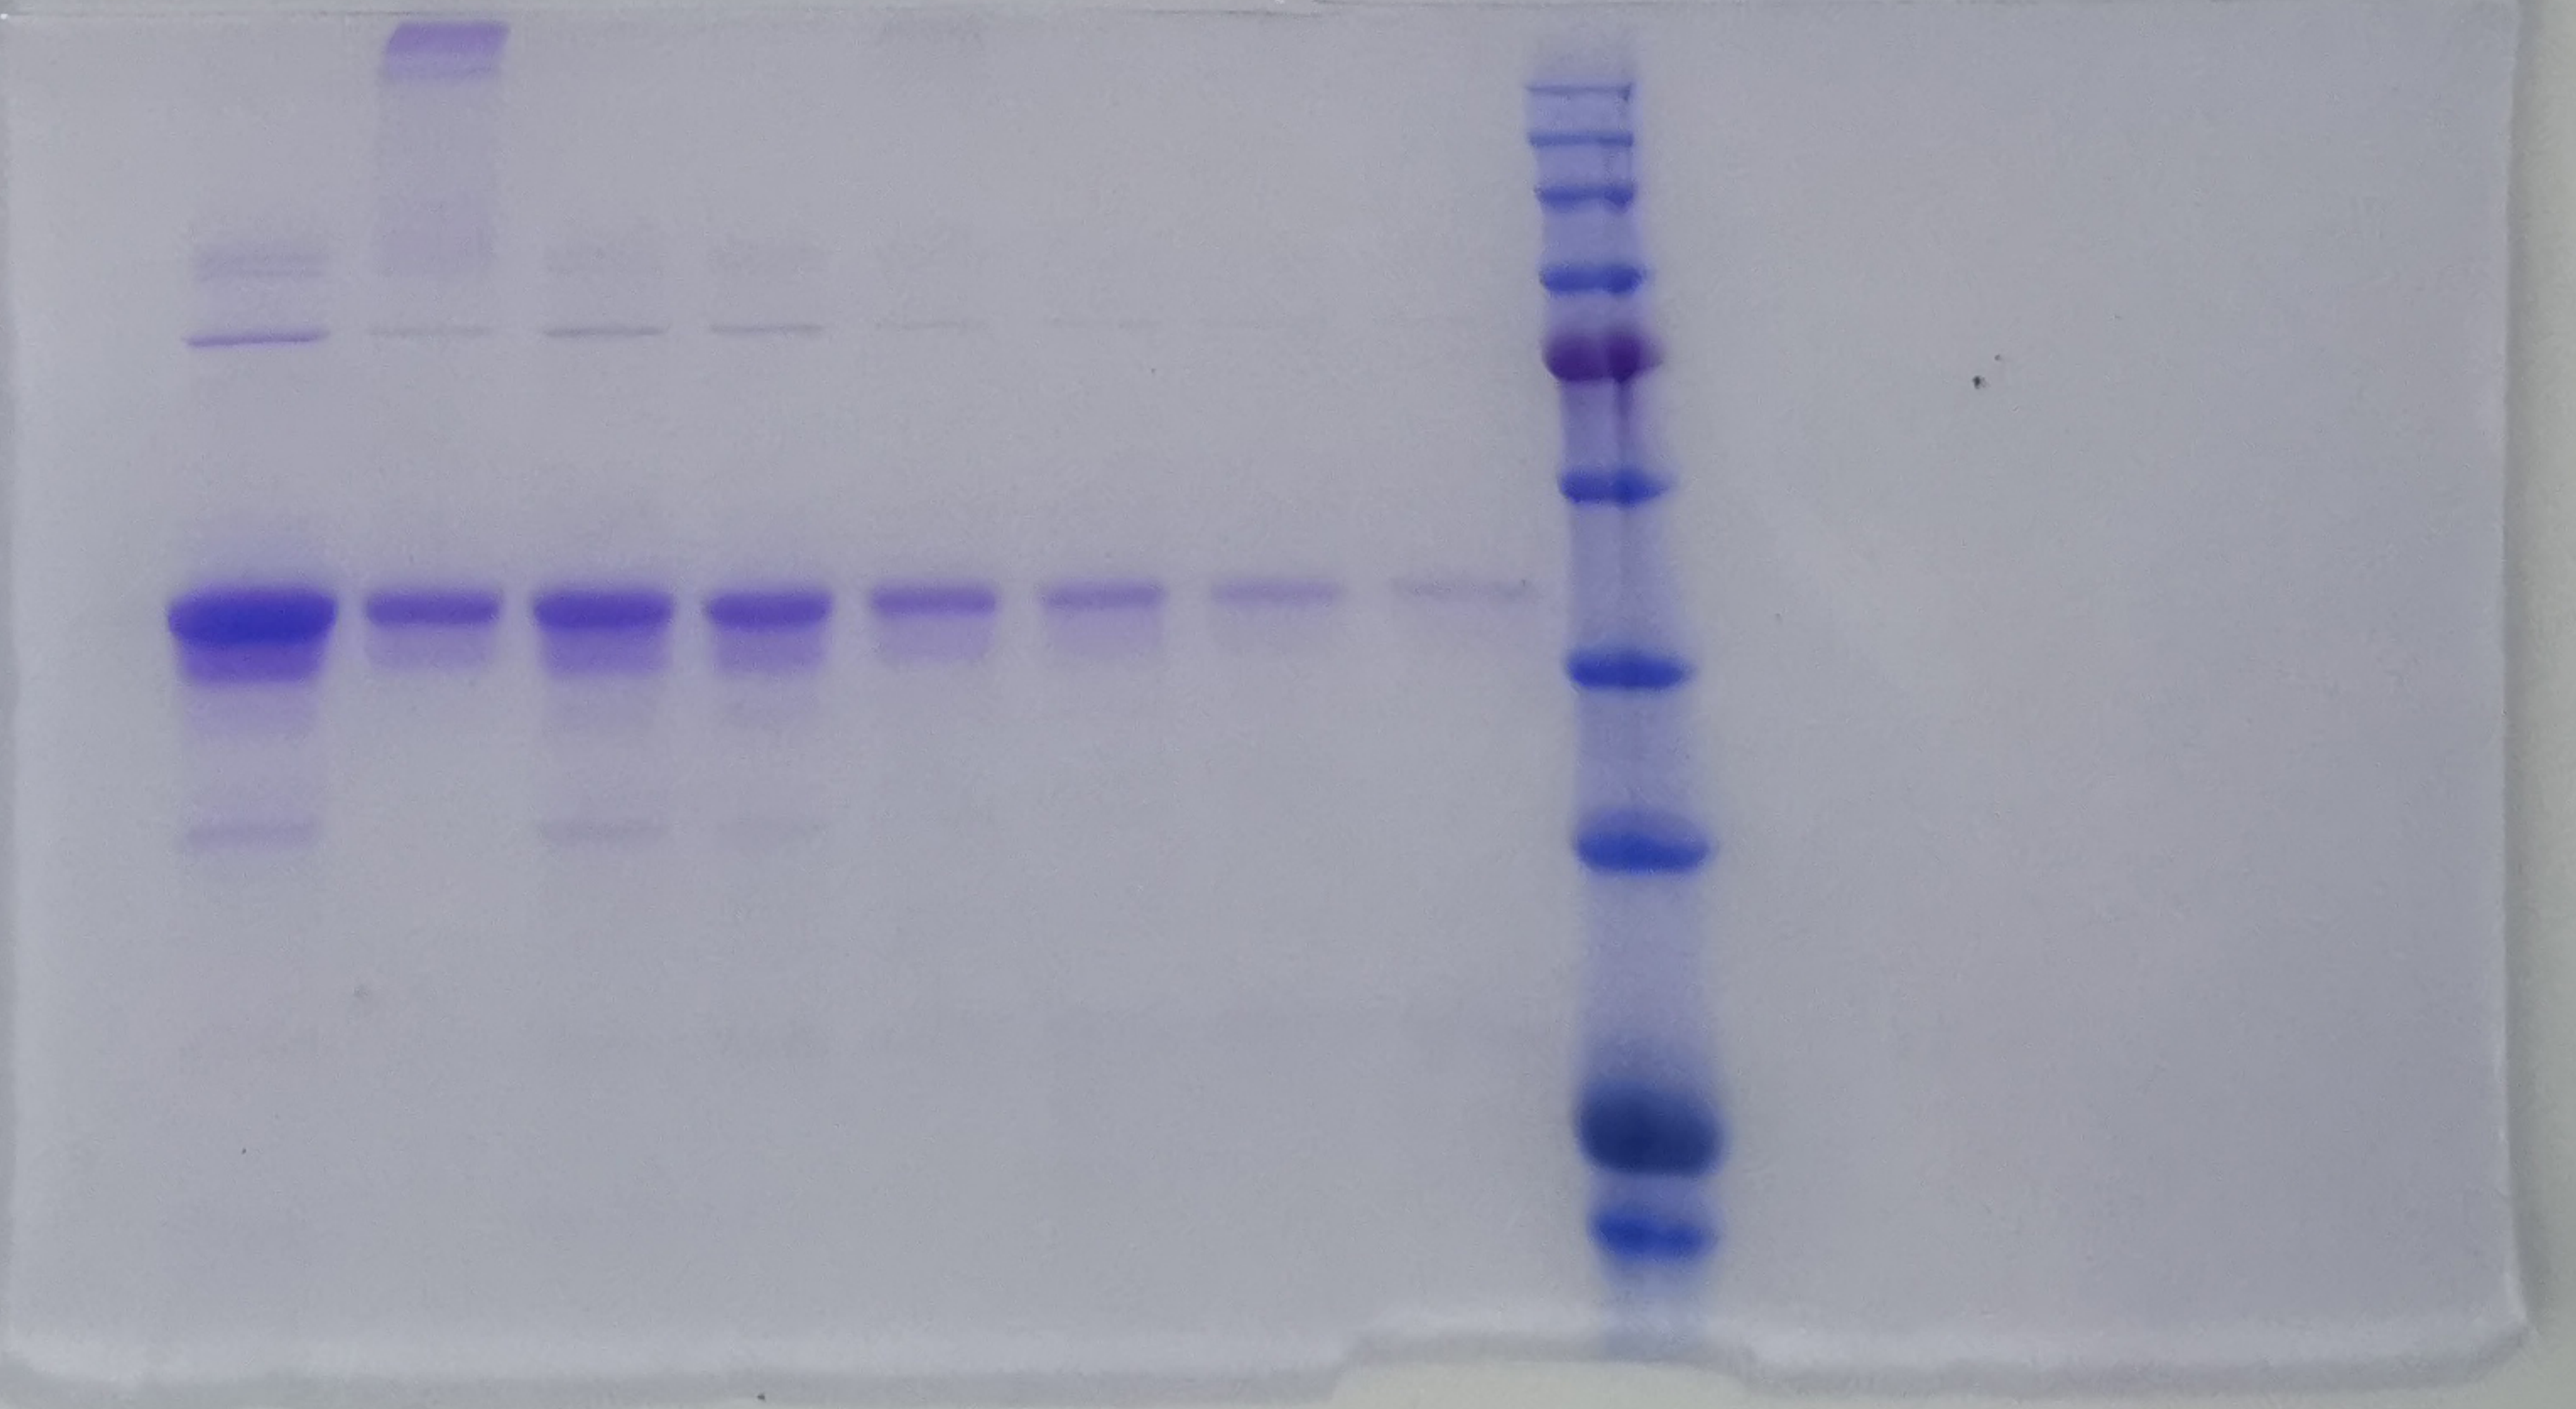

Supplement: fig1-figsupp1-data4 [file elife-86258-fig1-figsupp1-data4-v2.pdf]
