# Supplementary material for: Structures of NF-κB p52 homodimer-DNA complexes rationalize binding mechanisms and transcription activation
Source: eLife journal article supplement (doi:10.7554/elife.86258), 2023-02-13
Supplement: fig6-figsupp2-data1 [file elife-86258-fig6-figsupp2-data1-v2.pdf]

**Figure 6-figure supplement 2A**

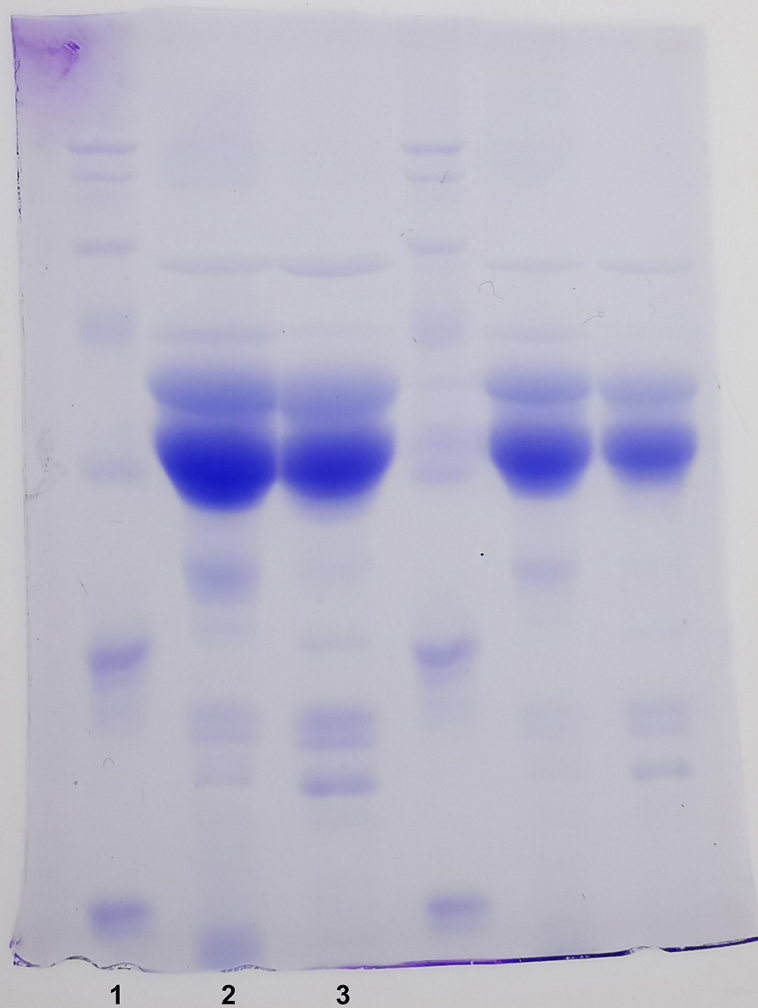

**1: MW Std**

**2: p52:Bcl3 (WT)**

**3: p52:Bcl3 (phospho-mimetic)**
