# Supplementary material for: Structures of NF-κB p52 homodimer-DNA complexes rationalize binding mechanisms and transcription activation
Source: eLife journal article supplement (doi:10.7554/elife.86258), 2023-02-13

**Figure 8-figure supplement 1A**

**1: MW Std**  
**2: p52(WT)**  
**3: p52(K144A)**

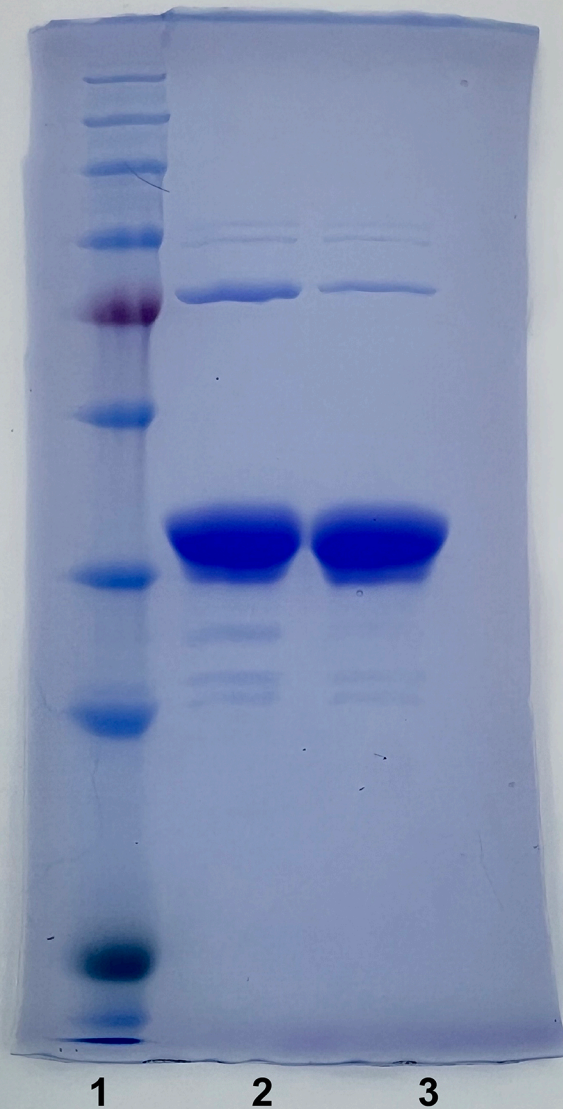

Supplement: fig8-figsupp1-data1 [file elife-86258-fig8-figsupp1-data1-v2.pdf]
