# Supplementary material for: Structures of NF-κB p52 homodimer-DNA complexes rationalize binding mechanisms and transcription activation
Source: eLife. 2023 Feb 13;12:e86258. doi: 10.7554/eLife.86258 (PMC9991059; doi:10.7554/eLife.86258)
Supplement: Supplementary file 3. [file elife-86258-supp3.xlsx]

## Sheet: 工作表1
	Supplementary File 3. Summary of protein-DNA contacts.
		p52:p52-PSel(natural G/C-centric)_18bp (PDB 7CLI) (this study)						p52:p52-PSel(mutant A/T-centric)_18bp (PDB 7VUQ) (this study)						p52:p52-PSel(-1/+1 SWAP)_18bp (PDB 7VUP) (this study)
		p52 MonomerⅠ			p52 MonomerⅡ			p52 MonomerⅠ			p52 MonomerⅡ			p52 MonomerⅠ			p52 MonomerⅡ
		DNA	Protein	Distance (Å)	DNA	Protein	Distance (Å)	DNA	Protein	Distance (Å)	DNA	Protein	Distance (Å)	DNA	Protein	Distance (Å)	DNA	Protein	Distance (Å)
	Backbone	A(+7) OP2	Ser61 OG	2.79	A(-7) OP2	Ser61 OG	3.13	A(+7) OP2	Ser61 OG	2.66	A(-7) OP2	Ser61 OG	3.13	A(+7) OP2	Ser61 OG	2.75	A(-7) OP2	Ser61 OG	2.61
		A(+6) N7	Ser61 O	x(3.49)	G(-6) N7	Ser61 O	x(3.85)	A(+6) N7	Ser61 O	x(3.57)	G(-6) N7	Ser61 O	3.08	A(+6) N7	Ser61 O	3.28	G(-6) N7	Ser61 O	3.2
		x	x	x	G(-5) OP1	Lys75 NZ	3.13	x	x	x	G(-5) OP1	Lys75 NZ	x(5.79)	x	x	x	G(-5) OP1	Lys75 NZ	x(4.78)
					G(-5) OP2		x(3.70)				G(-5) OP2		x(6.14)				G(-5) OP2		x(5.40)
	Base contact	G(+5) O6	His62 ND1	3.26	G(-5) O6	His62 ND1	x(3.57)	G(+5) O6	His62 ND1	3.12	G(-5) O6	His62 ND1	x(3.67)	G(+5) O6	His62 ND1	x(3.43)	G(-5) O6	His62 ND1	x(3.62)
		G(+5) N7		2.93	G(-5) N7		2.8	G(+5) N7		2.88	G(-5) N7		3.09	G(+5) N7		3.1	G(-5) N7		x(3.52)
		G(+4) O6	Arg54 NH1	3.08	G(-4) O6	Arg54 NH1	3.19	G(+4) O6	Arg54 NH1	3.16	G(-4) O6	Arg54 NH1	3.36	G(+4) O6	Arg54 NH1	3.03	G(-4) O6	Arg54 NH1	2.76
			Arg54 NH2	x(4.48)		Arg54 NH2	x(4.54)		Arg54 NH2	x(4.65)		Arg54 NH2	x(4.50)		Arg54 NH2	x(4.18)		Arg54 NH2	x(3.88)
		G(+4) N7	Arg54 NH1	x(3.66)	G(-4) N7	Arg54 NH1	x(3.63)	G(+4) N7	Arg54 NH1	x(3.45)	G(-4) N7	Arg54 NH1	x(3.84)	G(+4) N7	Arg54 NH1	x(3.65)	G(-4) N7	Arg54 NH1	x(3.91)
			Arg54 NH2	3.27		Arg54 NH2	3.22		Arg54 NH2	3.08		Arg54 NH2	3.27		Arg54 NH2	2.92		Arg54 NH2	3.18
			Arg52 NH1	x(3.92)		Arg52 NH1	x(4.53)		Arg52 NH1	x(4.34)		Arg52 NH1	x(3.80)		Arg52 NH1	x(3.72)		Arg52 NH1	2.94
		G(+3) O6	Arg52 NH1	x(4.14)	G(-3) O6	Arg52 NH1	2.76	G(+3) O6	Arg52 NH1	3.27	G(-3) O6	Arg52 NH1	x(3.86)	G(+3) O6	Arg52 NH1	x(3.73)	G(-3) O6	Arg52 NH1	x(3.96)
			Arg52 NH2	3.19		Arg52 NH2	x(3.71)		Arg52 NH2	2.41		Arg52 NH2	2.74		Arg52 NH2	2.83		Arg52 NH2	3.15
		G(+3) N7	Arg52 NH1	3.24	G(-3) N7	Arg52 NH1	x(4.30)	G(+3) N7	Arg52 NH1	3.37	G(-3) N7	Arg52 NH1	x(3.48)	G(+3) N7	Arg52 NH1	3.17	G(-3) N7	Arg52 NH1	x(3.71)
			Arg52 NH2	x(4.19)		Arg52 NH2	3.26		Arg52 NH2	x(4.44)		Arg52 NH2	x(4.26)		Arg52 NH2	x(4.14)		Arg52 NH2	x(4.45)
		G(+2) O6	Lys221 NZ	2.63	G(-2) O6	Lys221 NZ	x(4.46)	G(+2) O6	Lys221 NZ	x(3.53)	G(-2) O6	Lys221 NZ	x(5.36)	G(+2) O6	Lys221 NZ	2.13	G(-2) O6	Lys221 NZ	x(5.29)
		x	x	x	x	x	x	x	x	x	x	x	x	x	x	x	x	x	x
	Backbone	G(-2) OP1	Gln284 NE2	2.79	x	x	x	G(-2) OP1	Gln284 NE2	2.73	x	x	x	G(-2) OP1	Gln284 NE2	2.44	G(+2) OP1	Gln284 NE2	2.54
		x	x	x	x	x	x	x	x	x	x	x	x	x	x	x	x	x	x
		T(-1) OP1	x	x	x	x	x	T(-1) OP1	x	x	x	x	x	A(-1) OP1	x	x	x	x	x
			Pro223 CB	3.15	T(+1) OP1	Pro223 CB	3.28		Pro223 CB	3.35	T(+1) OP1	Pro223 CB	x(3.49)		Pro223 CB	3.29	A(+1) OP1	Pro223 CB	x(3.51)
		G(0) OP1	Pro223 CD	x(3.75)	C(0) OP1	x	x	A(0) OP1	Pro223 CD	x(4.31)	T(0) OP1	x	x	G(0) OP1	Pro223 CD	x(3.82)	C(0) OP1	x	x
			Pro223 CG	x(3.77)		x	x		Pro223 CG	x(4.47)		x	x		Pro223 CG	x(3.89)		x	x
			Lys143 NZ	x(5.33)		Lys143 NZ	3.38		Lys143 NZ	x(4.79)		Lys143 NZ	x(5.27)		Lys143 NZ	x(5.33)		Lys143 NZ	x(5.11)
		A(+1) OP2	Tyr55 OH	3.4	A(-1)OP2	Tyr55 OH	2.77	A(+1) OP2	Tyr55 OH	2.71	A(-1)OP2	Tyr55 OH	2.55	T(+1) OP2	Tyr55 OH	3.05	T(-1)OP2	Tyr55 OH	2.94
		A(+1) OP1	Thr142 C	x(4.14)	A(-1) OP1	Thr142 C	3.27	A(+1) OP1	Thr142 C	3.28	A(-1) OP1	Thr142 C	x(3.58)	T(+1) OP1	Thr142 C	3.33	T(-1) OP1	Thr142 C	x(3.42)
			Thr142 CA	x(3.74)		Thr142 CA	3.2		Thr142 CA	3.12		Thr142 CA	3.39		Thr142 CA	3.32		Thr142 CA	3.35
			Lys143 N	2.79	A(-1) OP1	Lys143 N	2.45		Lys143 N	2.57		Lys143 N	2.84		Lys143 N	2.47		Lys143 N	2.59
		C(+2) OP2	Cys57 SG	x(3.52)	C(-2) OP2	Cys57 SG	x(3.64)	C(+2) OP2	Cys57 SG	x(3.72)	C(-2) OP2	Cys57 SG	x(3.57)	C(+2) OP2	Cys57 SG	x(3.80)	C(-2) OP2	Cys57 SG	x(3.59)
		C(+2) O5'		x(3.41)	C(-2) O5'		3.36	C(+2) O5'		3.08	C(-2) O5'		3.09	C(+2) O5'		3.37	C(-2) O5'		3.35
	Base contact	C(+2) N4	x	x	C(-2) N4	x	x	C(+2) N4	x	x	C(-2) N4	x	x	C(+2) N4	x	x	C(-2) N4	x	x
			Arg52 NH2	x(3.57)		Arg52 NH2	x(5.40)		Arg52 NH2	x(3.56)		Arg52 NH2	x(3.72)		Arg52 NH2	x(3.47)		Arg52 NH2	3.27
		C(+3) N4	Arg52 NH2	x(3.59)	C(-3) N4	Arg52 NH1	x(3.48)	C(+3) N4	Arg52 NH2	x(3.70)	C(-3) N4	Arg52 NH2	x(3.67)	C(+3) N4	Arg52 NH2	x(4.19)	C(-3) N4	Arg52 NH2	x(3.69)
			Glu58 OE1	3.04		Glu58 OE1	3.23		Glu58 OE1	2.91		Glu58 OE1	3.06		Glu58 OE1	x(3.43)		Glu58 OE1	x(3.64)
		C(+4) N4	Glu58 O	3.32	C(-4) N4	Glu58 O	x(4.47)	C(+4) N4	Glu58 O	x(3.73)	C(-4) N4	Glu58 O	x(3.77)	C(+4) N4	Glu58 O	x(4.10)	C(-4) N4	Glu58 O	x(5.98)
		p52:p52-PSel(mutant A/T-centric)_13bp (PDB 7W7L) (this study)						p52:p52-MHC (PDB 1A3Q)						p50:RelA-IFNb (PDB 1LE5)
		p52 MonomerⅠ			p52 MonomerⅡ			p52 MonomerⅠ			p52 MonomerⅡ			RelA subunit			p50 subunit
		DNA	Protein	Distance (Å)	DNA	Protein	Distance (Å)	DNA	Protein	Distance (Å)	DNA	Protein	Distance (Å)	DNA	Protein	Distance (Å)	DNA	Protein	Distance (Å)
	Backbone
	Base contact	G(+5) O6	His62 ND1	x(3.53)	G(-5) O6	His62 ND1	x(3.44)	G(+5) O6	His62 ND1	3.4	x	x	x				G(-5) O6	His64 ND1	2.7
		G(+5) N7		2.76	G(-5) N7		2.67	G(+5) N7		2.82	x		x				G(-5) N7		x(3.65)
		G(+4) O6	Arg54 NH1	2.81	G(-4) O6	Arg54 NH1	2.69	G(+4) O6	Arg54 NH1	3.14	G(-4) O6	Arg54 NH1	2.99	G(+4) O6	Arg35 NH1	x(3.72)	G(-4) O6	Arg56 NH1	x(5.08)
			Arg54 NH2	x(3.87)		Arg54 NH2	x(3.76)		Arg54 NH2	x(4.23)		Arg54 NH2	x(4.18)		Arg35 NH2	x		Arg56 NH2	x(5.53)
		G(+4) N7	Arg54 NH1	x(3.72)	G(-4) N7	Arg54 NH1	x(3.67)	G(+4) N7	Arg54 NH1	x(3.58)	G(-4) N7	Arg54 NH1	x(3.67)	G(+4) N7	Arg35 NH1	x(5.10)	G(-4) N7	Arg56 NH1	x(5.44)
			Arg54 NH2	2.74		Arg54 NH2	2.68		Arg54 NH2	3.04		Arg54 NH2	3.03		Arg35 NH2	x		Arg56 NH2	x(4.89)
			Arg52 NH1	x(4.68)		Arg52 NH1	x(4.74)		Arg52 NH1	3.16		Arg52 NH1	2.85		Arg33 NH1	3.38		Arg54 NH1	x(4.26)
		G(+3) O6	Arg52 NH1	2.69	G(-3) O6	Arg52 NH1	2.72	G(+3) O6	Arg52 NH1	2.89	G(-3) O6	Arg52 NH1	x(3.79)	G(+3) O6	Arg33 NH1	x(4.04)	G(-3) O6	Arg54 NH1	2.8
			Arg52 NH2	3.06		Arg52 NH2	3.26		Arg52 NH2	2.82		Arg52 NH2	3.29		Arg33 NH2	2.99		Arg54 NH2	x(4.05)
		G(+3) N7	Arg52 NH1	x(4.96)	G(-3) N7	Arg52 NH1	x(4.78)	G(+3) N7	Arg52 NH1	x(3.65)	G(-3) N7	Arg52 NH1	x(4.07)	G(+3) N7	Arg33 NH1	2.83	G(-3) N7	Arg54 NH1	x(4.05)
			Arg52 NH2	x(3.72)		Arg52 NH2	x(3.61)		Arg52 NH2	x(4.93)		Arg52 NH2	x(4.78)		Arg33 NH2	3.55		Arg54 NH2	x(5.51)
		G(+2) O6	Lys221 NZ	2.64	G(-2) O6	Lys221 NZ	2.87	G(+2) O6	Lys221 NZ	2.84	G(-2) O6	Lys221 NZ	2.76	x	x	x	A(-2) N6	Arg54 NH2	2.95
		x	x	x	x	x	x	x	x	x	x	x	x	x	x	x	T(-1) O4	Lys241 NZ	x(3.47)
	Backbone	G(-2) OP1	Gln284 NE2	x(6.41)	x	x	x	x	x	x	x	x	x
		T(-1) OP2	Gln284 NE2	3.3	T(+1) OP2	Gln284 NE2	2.83	A(-1) OP1	Gln254 NE2	x(4.21)	A(+1) OP1	Gln254 NE2	2.76				A(+1) OP1	Gln274 NE2	x(3.78)
									Gln284 NE2	x(3.47)		Gln284 NE2	3.3
		T(-1) OP1	Gln254 NE2	3.23	T(+1) OP1	Gln254 NE2	x(3.46)	A(-1) OP2	Gln284 NE2	3.28	A(+1) OP2	Gln284 NE2	3.33				A(+1) OP2	Gln306 NE2	x(3.78)
			Pro223 CB	x(3.83)		Pro223 CB	x(3.85)		Pro223 CB	3.3		Pro223 CB	x(3.60)					Gln306 OE1	2.88
									Pro223 CG	3.39		Pro223 CG	3.39
		A(0) OP2	Pro223 CD	x(3.89)	T(0) OP1	Pro223 CD	x(3.60)	A(0) OP2	Pro223 CD	x(3.44)	T(0) OP2	Pro223 CD	x(3.47)
			Pro223 CG	x(4.69)		Pro223 CG	x(4.42)
			Lys143 NZ	x(7.64)		Lys143 NZ	x(3.47)
		A(+1) OP2	Tyr55 OH	2.54	A(-1)OP2	Tyr55 OH	2.66	T(+1) OP2	Tyr55 OH	2.66	T(-1) OP2	Tyr55-OH	2.67	T(+1) OP2	Tyr 36 OH	2.31	T(-1) OP2	Tyr 57 OH	x(4.56)
		A(+1) OP1	Thr142 C	x(3.44)	A(-1) OP1	Thr142 C	x(3.67)	T(+1) OP1	Thr142 CA	3.5	T(-1) OP1	Thr142 CA	x(3.82)	T(+1) OP1	Lys123 N	x(3.65)	T(-1) OP1	Lys144 N	x(3.91)
			Thr142 CA	3.2		Thr142 CA	x(3.41)
			Lys143 N	2.76		Lys143 N	2.97		Lys143 N	2.83		Lys143 N	3.01
		C(+2) OP2	Cys57 SG	x(3.43)	C(-2) OP2	Cys57 SG	3.04	C(+2) OP2	Cys57 SG	x(3.46)	C(-2) OP2	Cys57 SG	x(3.54)				T(-2) OP2	Cys59 N	2.98
		C(+2) O5'		3.23	C(-2) O5'		3.15	C(+2) O5'		3.38	C(-2) O5'		3.29
	Base contact	C(+2) N4	x	x	C(-2) N4	x	x	C(+2) N4	x	x	C(-2) N4	x	x	T(+2) O4	Arg187 NH2	2.57	T(-2) O4	x	x
			Arg52 NH1	3.26		Arg52 NH1	3.23		Arg52 NH2	2.92		Arg52 NH2	3.02		Arg35 NH2	x(3.53)		Arg54 NH2	2.32
		C(+3) N4	Arg52 NH1	3.09	C(-3) N4	Arg52 NH1	3.26	C(+3) N4	Arg52 NH2	3.39	C(-3) N4	Arg52 NH2	x(3.78)	C(+3) N4	Arg35 NH1	3.28	C(-3) N4	Arg54 NH1	x(4.42)
			Glu58 OE1	2.9		Glu58 OE1	3.05		Glu58 OE1	3.01		Glu58 OE1	2.6		Glu39 OE1	2.8		Glu60 OE1	x(3.98)
		C(+4) N4	Glu58 O	x(3.63)	C(-4) N4	Glu58 O	x(3.42)	C(+4) N4	Glu58 O	x(3.82)	x	x	x	x	x	x
	Blue:	Base specific contacts
	Black:	Phosphate backbone contacts
	x(number):	No H-bonds (distance more than 3.40Å), numbers in parentheses are distances shown as references
	Yellow highlight:	Most significantly different regions in p52-P-Selectin structure vs. previous known NF-kB-DNA structures
